# Supplementary material
Source: PubMed Central journal article supplement (PMC9358847)
Supplement: NIHMS1827730-supplement-supplement.pdf [file NIHMS1827730-supplement-supplement.pdf]

## **SUPPORTING INFORMATION for**

A clostripain-like protease plays a major role in generating the secretome of enterotoxigenic *Bacteroides fragilis*

Jessica V. Pierce\*, Justin D. Fellows\*, D. Eric Anderson# and Harris D. Bernstein\*

Genetics and Biochemistry Branch\* and Advanced Mass Spectrometry Facility#,  
National Institute of Diabetes and Digestive and Kidney Diseases, NIH, Bethesda, MD 20892 USA

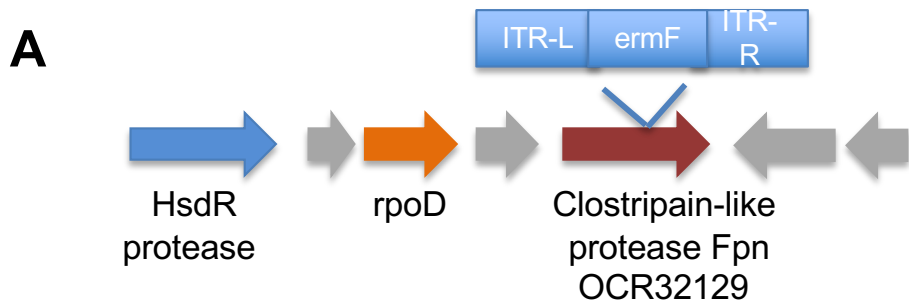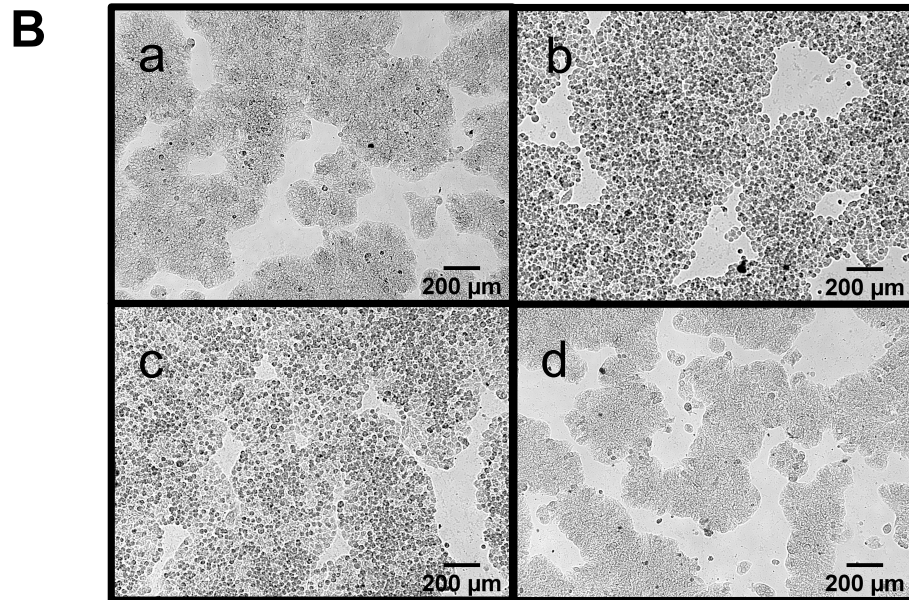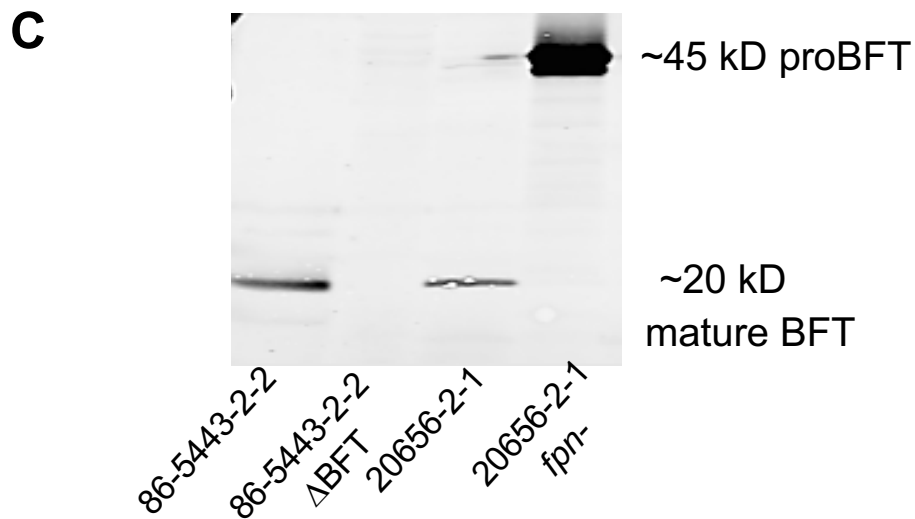

**Figure S1. Identification of a transposon insertion that blocks BFT maturation.** *A*, Diagram of the transposon insertion site in ETBF strain 20656-2-1. The putative function of neighboring genes is indicated. Genes of unknown function are shown in gray. *B*, HT29 cells were incubated with culture medium from *B. fragilis* strain NCTC 9343 (a), NCTC 9343 pFD340:BFT (b), ETBF 20656-2-1 (c) or ETBF 20656-2-1 *fpn*<sup>-</sup> (d) and observed after 6 h. Fixed cells were examined at 10X magnification. The rounding up of cells in (b) and (c) shows intoxication with BFT. *C*, The culture medium of the indicated strains was analyzed by Western blot using an anti-BFT antiserum.

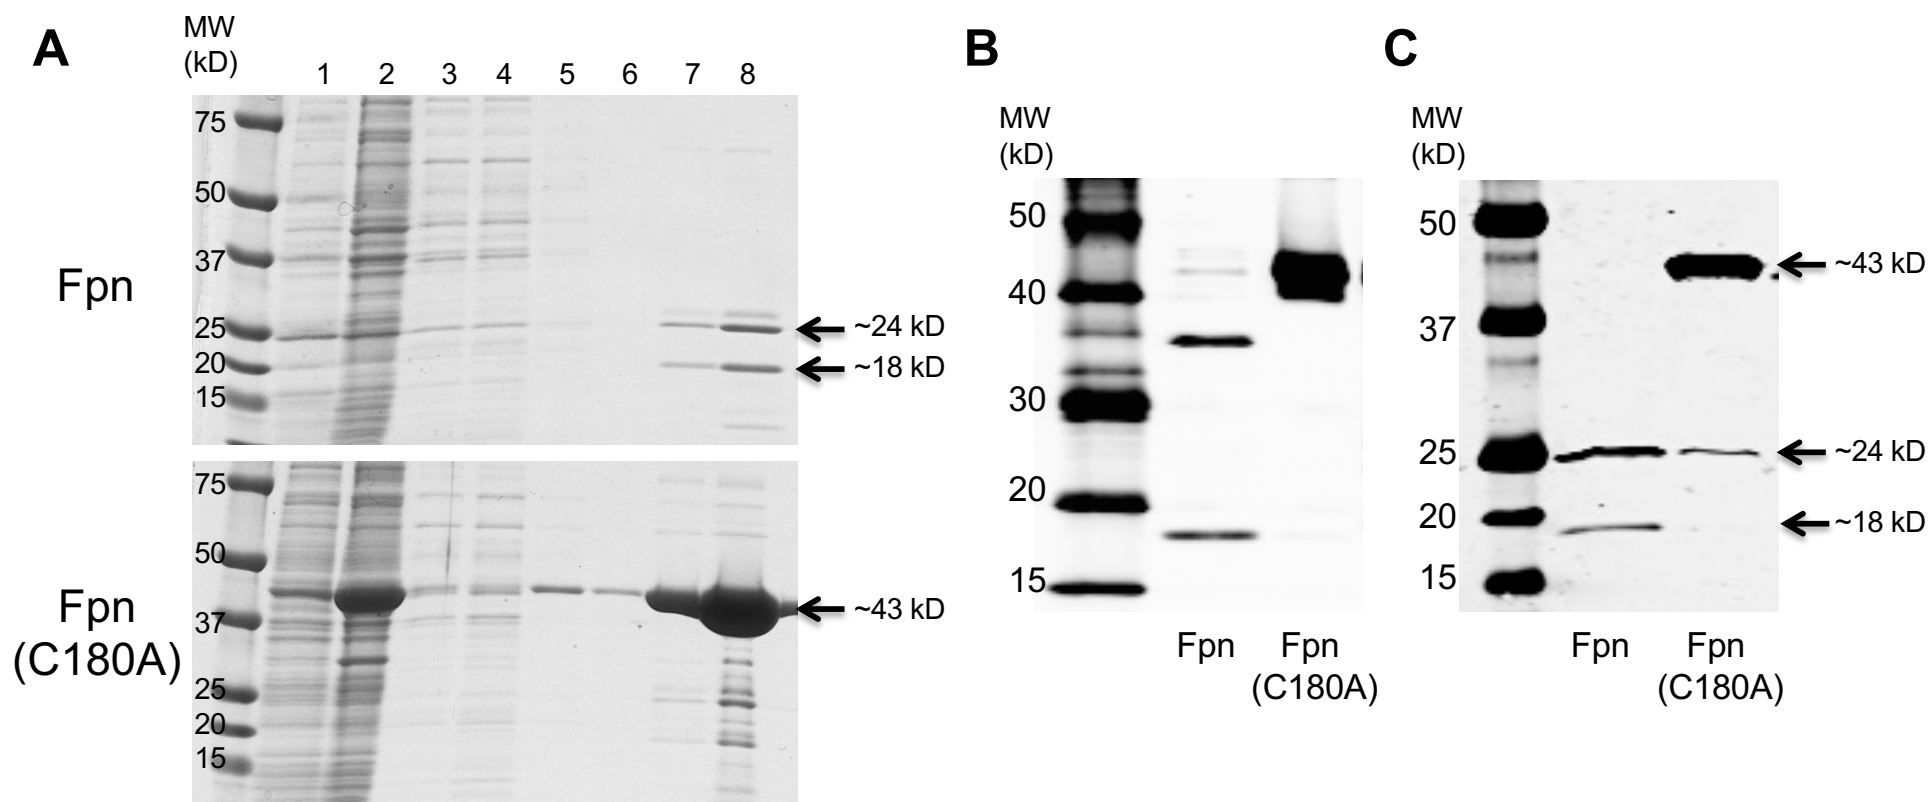

**Figure S2. Purification of the *B. fragilis* Fpn protease.** A, Fpn protease and the Fpn (C180A) mutant containing an N-terminal 6xHis tag in place of the signal peptide were expressed in *E. coli* and purified on a Ni-NTA column. Lanes: 1, uninduced; 2, induced; 3, Ni-NTA input (diluted ~5 fold); 4, flow through; 5-6, washes; 7-8, elution fractions. Following SDS-PAGE proteins were detected by Coomassie Blue staining. The purified proteins were analyzed by Western blot using anti-6xHis (B) and anti-Fpn (C) antisera.

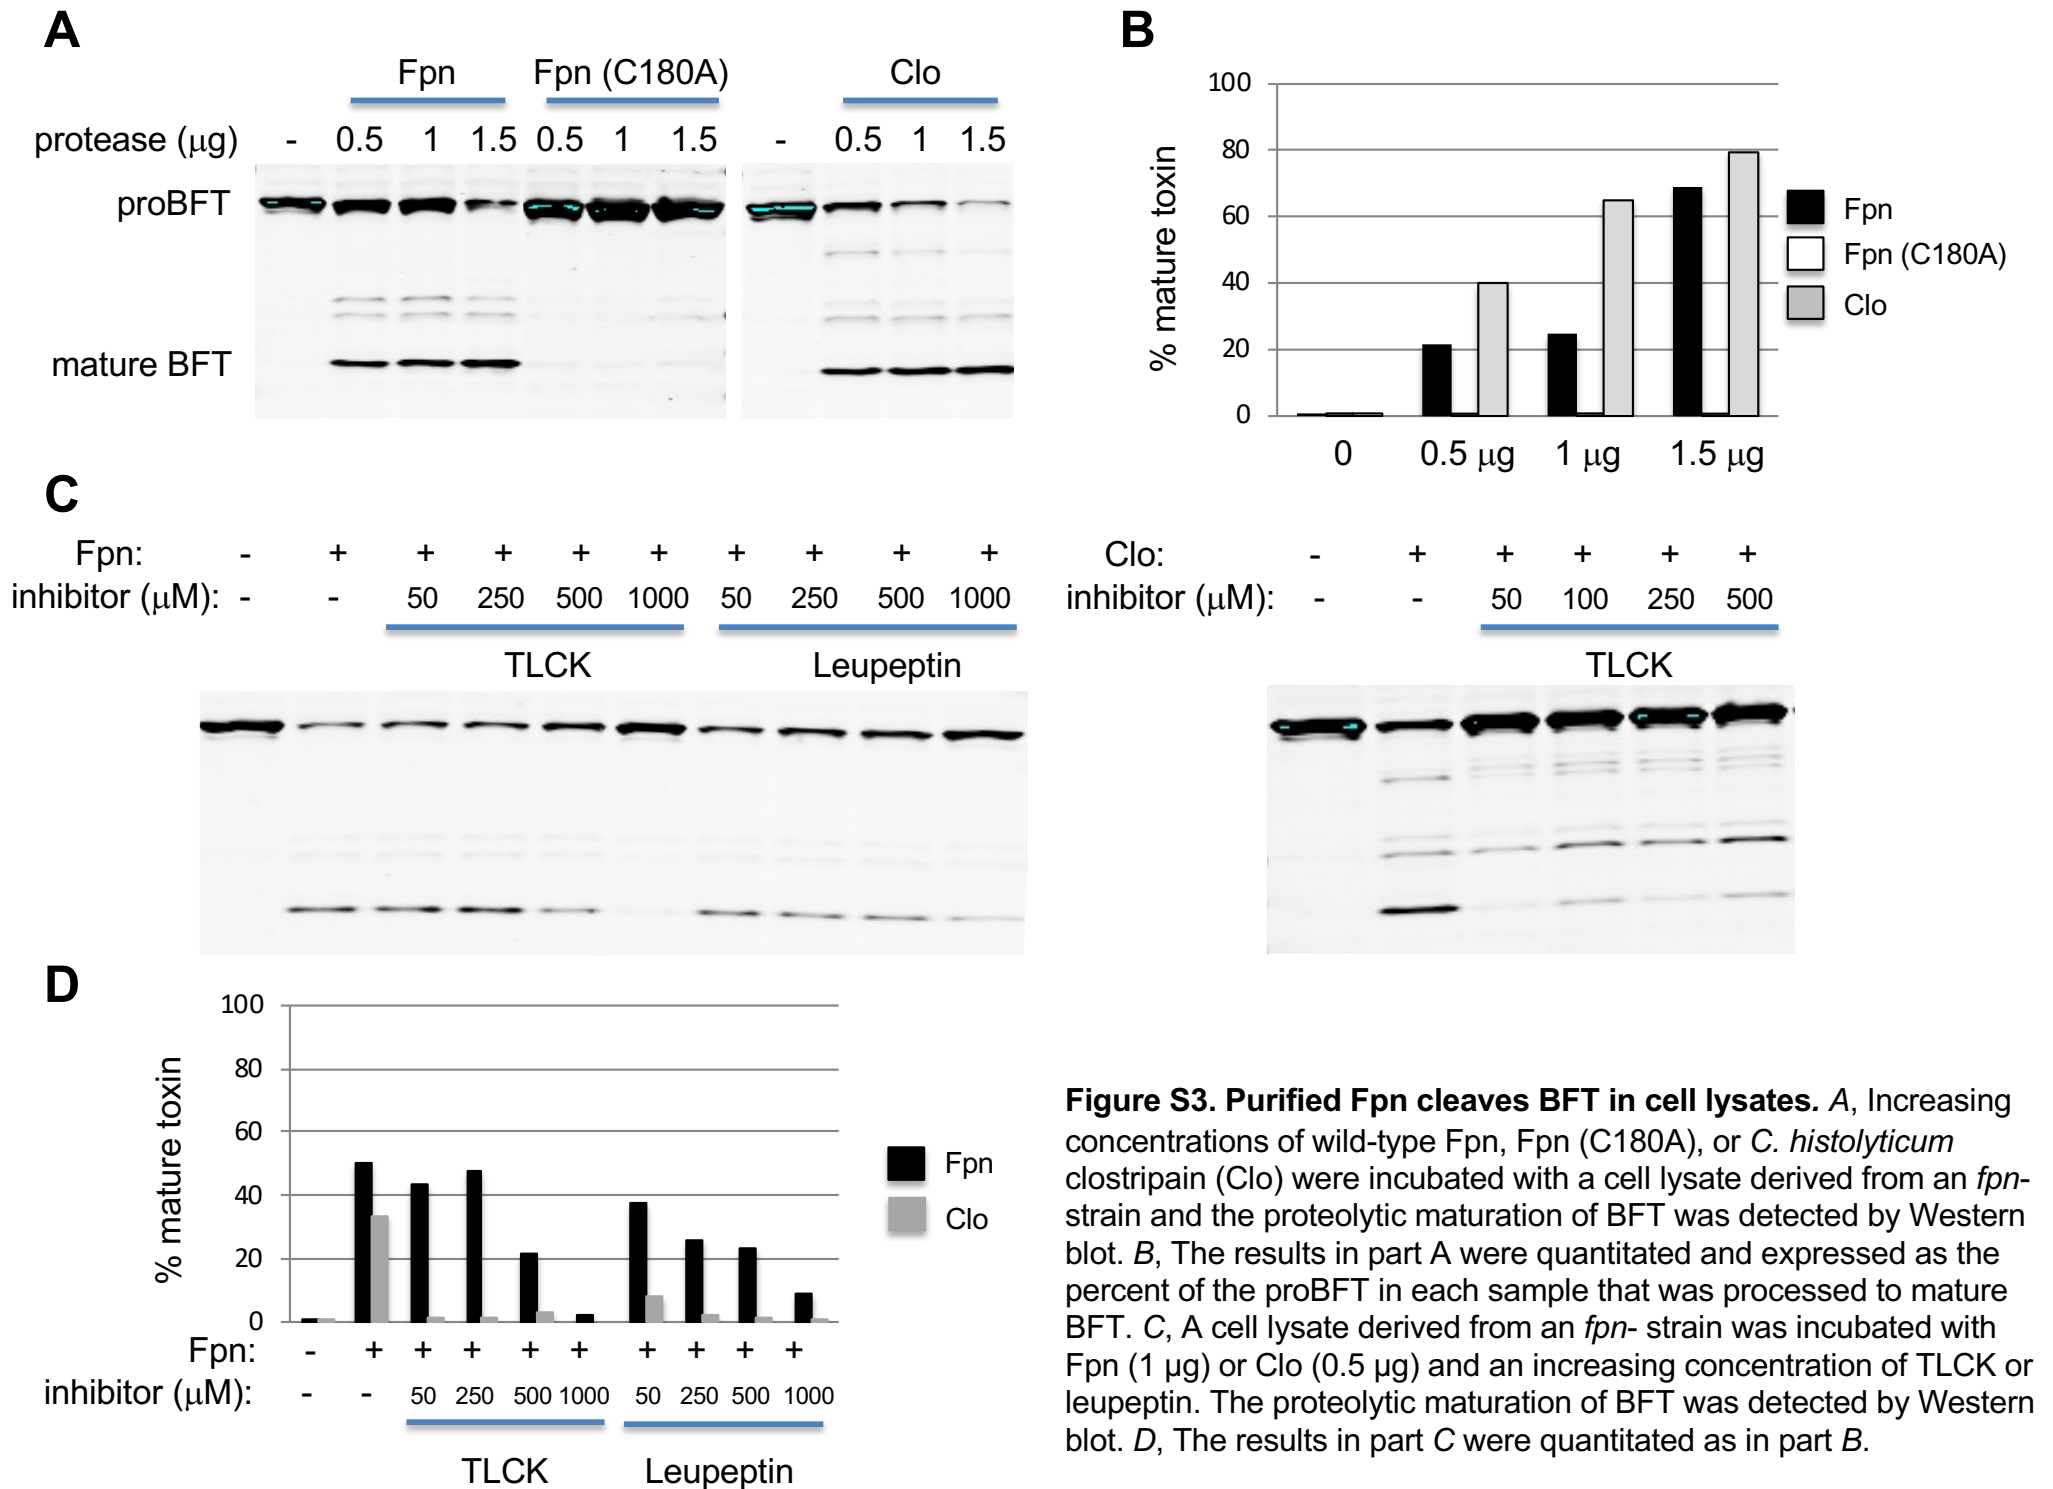

**Figure S3. Purified Fpn cleaves BFT in cell lysates.** *A*, Increasing concentrations of wild-type Fpn, Fpn (C180A), or *C. histolyticum* clostripain (Clo) were incubated with a cell lysate derived from an *fpn*-strain and the proteolytic maturation of BFT was detected by Western blot. *B*, The results in part *A* were quantitated and expressed as the percent of the proBFT in each sample that was processed to mature BFT. *C*, A cell lysate derived from an *fpn*- strain was incubated with Fpn (1  $\mu\text{g}$ ) or Clo (0.5  $\mu\text{g}$ ) and an increasing concentration of TLCK or leupeptin. The proteolytic maturation of BFT was detected by Western blot. *D*, The results in part *C* were quantitated as in part *B*.

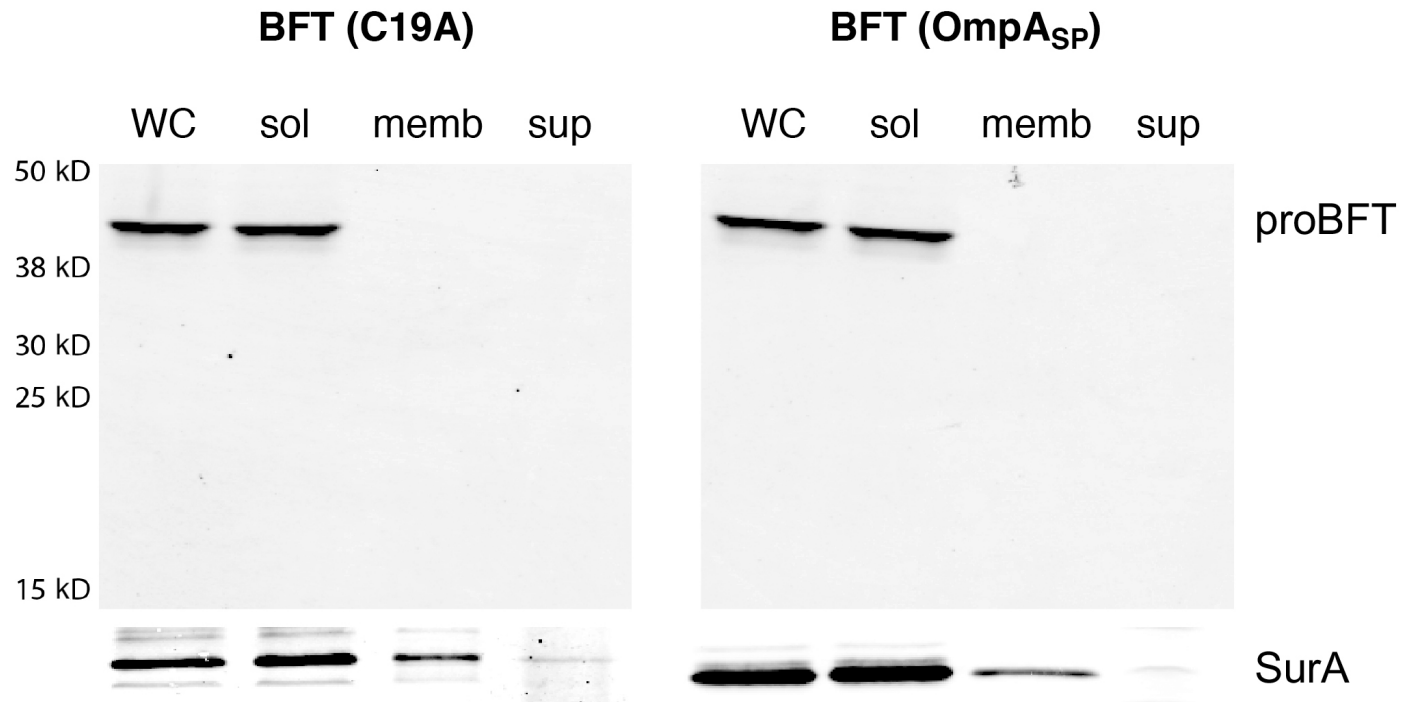

**Figure S4. Mutations in the BFT lipobox or signal peptide abolish proteolytic processing.** A wild-type ETBF strain transformed with pFD340 containing the gene that encodes BFT C19A or BFT (OmpA<sub>SP</sub>) was grown to mid-log phase, and cells were separated from the culture medium (sup) by centrifugation. Whole cell lysates (WC) were then separated into membrane (memb) and soluble (sol) fractions. Samples were analyzed by Western blot using antisera against BFT and SurA.

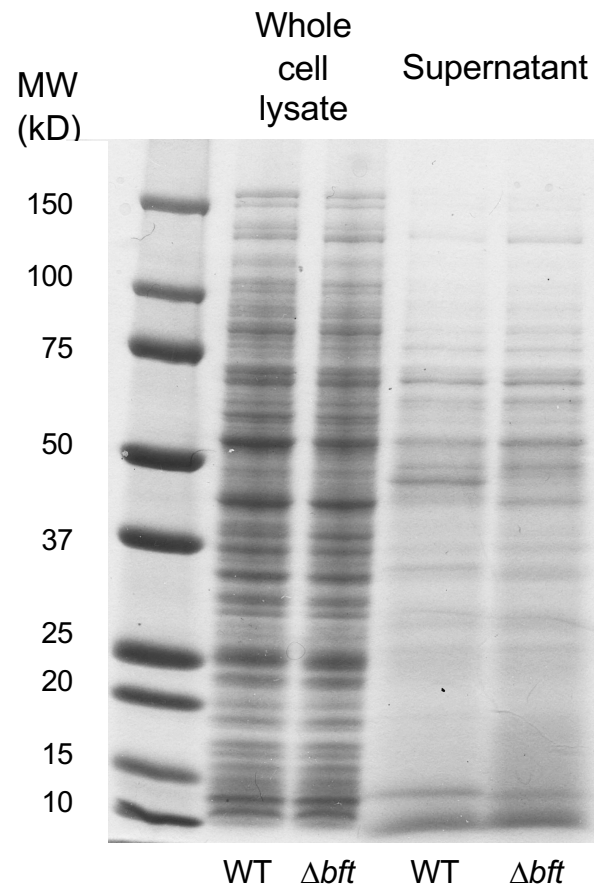

**Figure S5. BFT plays only a minor role in the generation of the ETBF secretome.** Cultures of wild-type strain 86-5543-2-2 (WT) and an isogenic  $\Delta bft$  strain were grown to log phase. Cells were then isolated by centrifugation, and the protein content of the whole cell lysate and culture medium (supernatant) was analyzed by SDS-PAGE and Colloidal Blue staining. Culture medium samples were 20x more concentrated than the cell lysate samples.

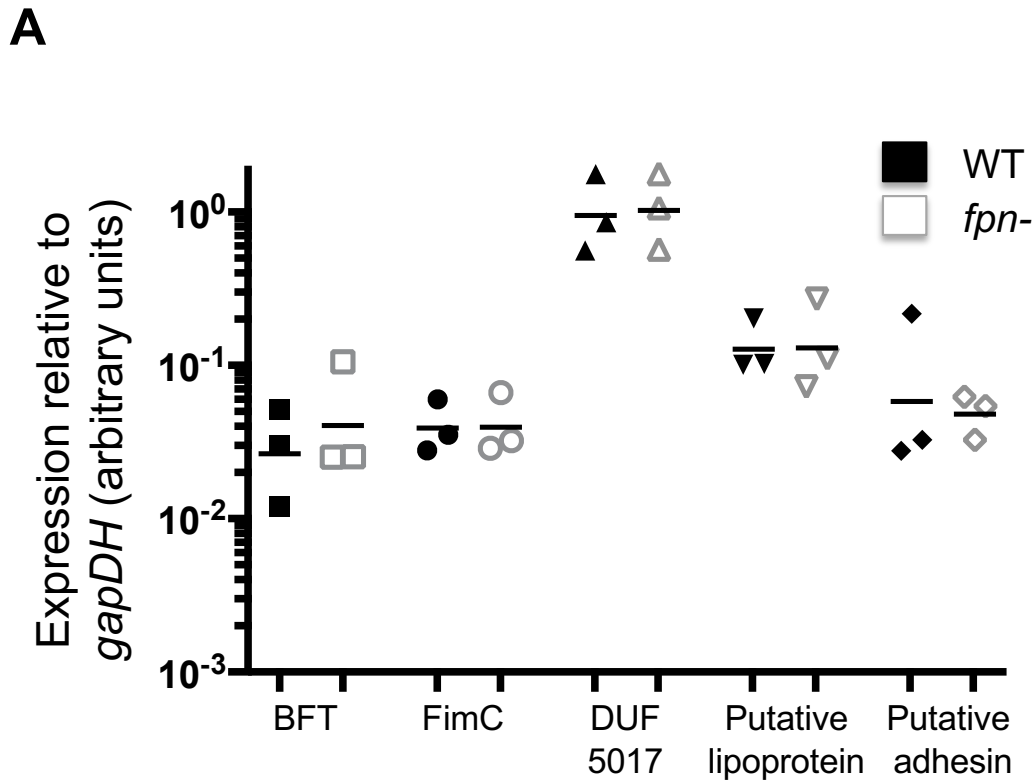

**B**

| Ratio ( <i>fpn-</i> WT) | Protein               |
|-------------------------|-----------------------|
| 0.24                    | BFT                   |
| 0.16                    | FimC                  |
| 0.008                   | DUF5017*              |
| 0.022                   | Putative lipoprotein* |
| 0.006                   | Putative adhesin      |

**Figure S6. The loss of Fpn does not affect the expression of genes encoding secreted proteins.** *A*, The relative expression of genes encoding five proteins in wild-type ETBF and isogenic *fpn-* mutant strains was determined by quantitative RT-PCR using the oligonucleotides listed in Table S3. Expression was normalized to the level of *gapDH* in each strain and is shown in arbitrary units. *B*, The ratio of proteins analyzed in part *A* in the culture medium of the two strains as determined by quantitative mass spectrometry is indicated. Asterisks denote proteins that were identified as highly abundant secretome components (see Fig. 3).

**A**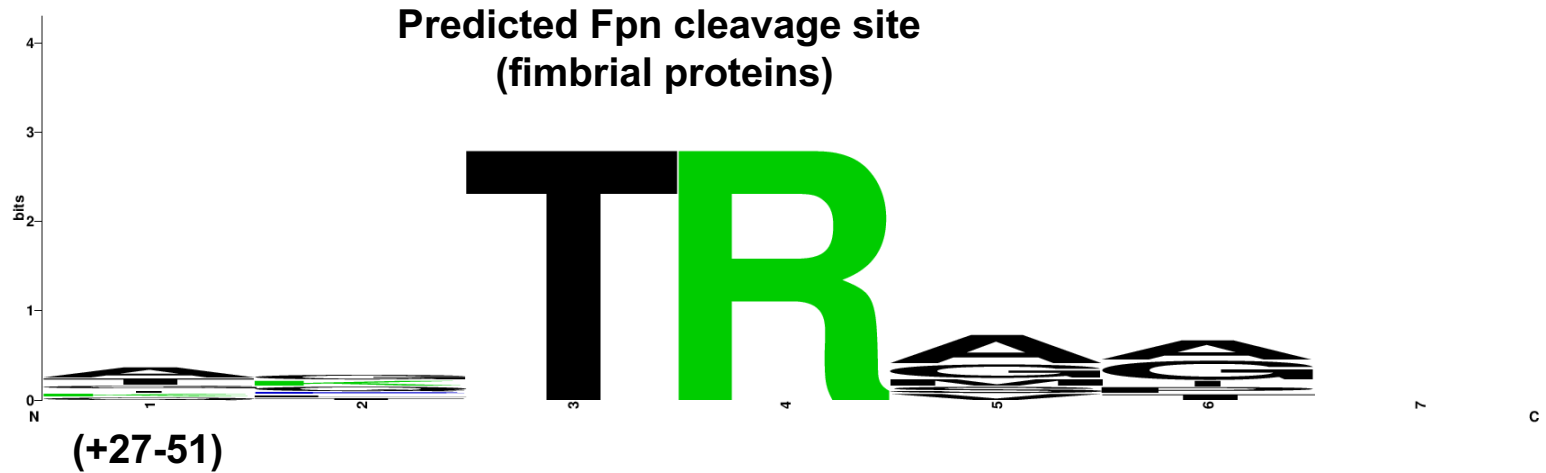**B**

|                        |                                  |                                 |
|------------------------|----------------------------------|---------------------------------|
| <b>Band 6 (Fig. 3)</b> | + <sup>34</sup> QI <b>TR</b> SS  |                                 |
| <b>Band 3 (Fig. 3)</b> | + <sup>81</sup> AT <b>TR</b> SA  |                                 |
| <b>BF9343_2214</b>     | + <sup>27</sup> AN <b>TR</b> ST  |                                 |
| <b>BF638R_4428</b>     | + <sup>26</sup> PG <b>TR</b> AA  | <b>N-terminal arginine</b>      |
| <b>BF9343_0726</b>     | + <sup>11</sup> AV <b>TR</b> VS  |                                 |
| <b>BF4433</b>          | + <sup>27</sup> AS <b>SR</b> AI  |                                 |
| <br>                   |                                  |                                 |
| <b>BF1567</b>          | + <sup>195</sup> TA <b>SR</b> GA | <b>Unique arginine</b>          |
| <br>                   |                                  |                                 |
| <b>BFT</b>             | + <sup>190</sup> SQ <b>TR</b> AV | <b>Mapped Fpn cleavage site</b> |

**Figure S7. Identification of a potential Fpn cleavage motif.** *A*, An arginine residue located near the N terminus of all nine fimbrial proteins whose levels were strongly reduced in the secretome of an *fpn*- strain (Fig. 4D) is embedded in a conserved sequence motif identified using Logo plot software (<https://weblogo.berkeley.edu/logo.cgi?>). The arginine is the first arginine in the mature region of seven of the proteins and is the predicted site of Fpn cleavage. *B*, The most N-terminal arginine residue of some of the proteins that were strongly reduced in the secretome of an *fpn*- strain (see Fig. 3, Table S2) as well as the sole arginine in BF1567 is embedded in a sequence motif that is similar to the motif identified in *A*. For comparison, the mapped Fpn cleavage site in BFT is shown.



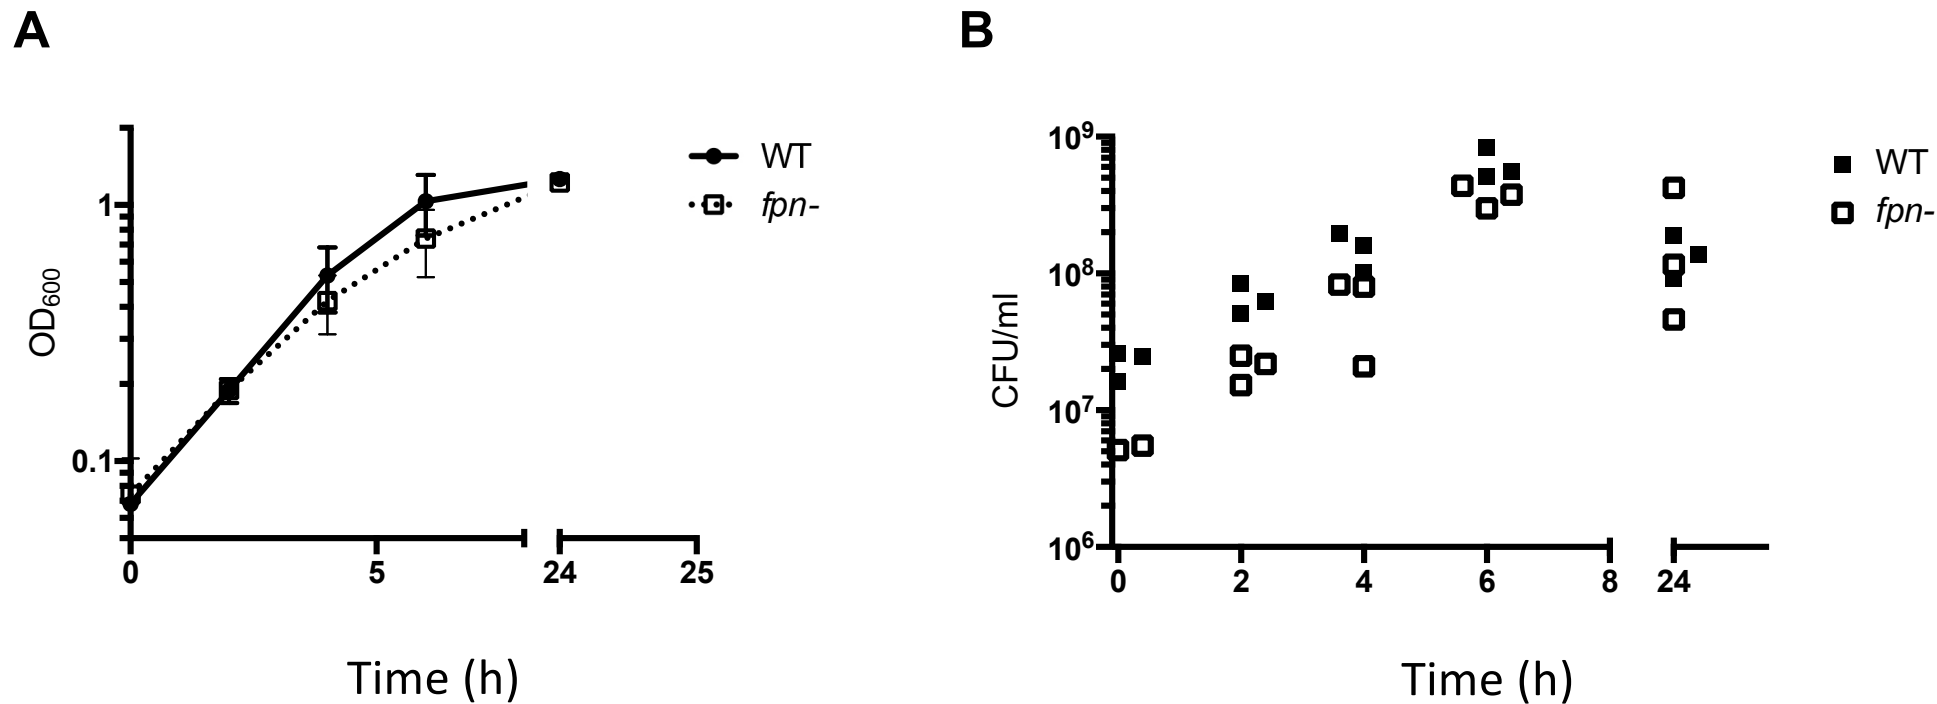

**Figure S8. The loss of Fpn does not affect cell viability during stationary phase.** *A*, The growth of wild-type (WT) ETBF and isogenic *fpn*<sup>-</sup> strains in rich medium was monitored at OD<sub>600</sub>. The standard deviation of three cultures is shown. *B*, Samples were removed from the cultures in *A* at various time points and the number of colony forming units (CFU) per ml was determined to assess cell viability.

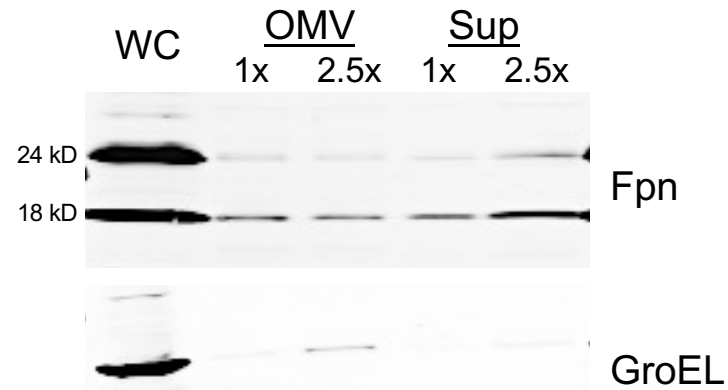

**Figure S9. Fpn is retained on the cell surface.** A wild-type ETBF strain was grown to mid-log phase and cells were separated from outer membrane vesicles (OMV) and the culture medium by centrifugation. A total cell lysate and the two extracellular fractions were then analyzed by Western blot using antisera against Fpn and GroEL. Protein derived from two and a half times as many cell equivalents was loaded in lanes marked “2.5x”.

Table S1. Peptides identified in gel slices by mass spectrometry

| Band | Predicted size (no SP) | Apparent size | KEGG ID     | pSORT                  |                      | Fold change ( <i>fjn</i> - <i>WT</i> )* | Annotation                               |
|------|------------------------|---------------|-------------|------------------------|----------------------|-----------------------------------------|------------------------------------------|
|      |                        |               |             | Predicted Localization | SP II+ (Lipoprotein) |                                         |                                          |
| 1    | 108                    | 100           | BF3307      | OM                     | No                   | 0.52                                    | TonB-dependent receptor / SusC-like      |
| 2    | 83                     | 78            | BF638R_4406 | Periplasmic            | Yes                  | 0.04                                    | Putative lipoprotein                     |
| 3    | 65                     | 65            | BF9343_3471 | Unknown                | Yes                  | 0.04                                    | PCDM domain, Lipocalin-like              |
| 4    | 68                     | 63            | BF1992      | Unknown                | Yes                  | 0.008                                   | DUF 5017, Bacteroidetes-specific protein |
| 5    | 54                     | 51            | BF0669      | Unknown                | Yes                  | 0.061                                   | SusD-like                                |
| 6    | 54                     | 49            | BF2685      | Unknown                | Yes                  | 0.014                                   | MACPF domain, pore forming toxin         |
| 7    | 43                     | 40            | BF1929      | Unknown                | Yes                  | 0.052                                   | DUF4856, Bacteroides-specific protein    |
| 8    | 40                     | 37            | BF1298      | OM                     | No                   | 0.406                                   | OmpA-like                                |
| 9    | 27                     | 28            | BF9343_2956 | Unknown                | Yes                  | 0.022                                   | Putative lipoprotein                     |

\* Data from quantitative comparison

**Peptide coverage (identified peptides shown in red)**

| Band           | KEGG ID     | Peptide 1       | Peptide 2  | Peptide 3   | Peptide 4   | Peptide 5   |
|----------------|-------------|-----------------|------------|-------------|-------------|-------------|
| Band 9:        | BF9343_2956 | 1 MKQLKMLVLT    | LTLMLGTMFT | SCMDSGESGP  | QQWAGVVKVN. | DRMGVYTFD   |
|                |             | 51 AAGTELIPTN   | TIPVTLNARM | AYIYQVDEG   | QDLSTNPKSI  | KITLLADPTG  |
|                |             | 101 IDATAITTPK  | VGESGDVTTN | APVGSLSFVS  | GYSTVAPFKY  | SENTIVLPVL  |
|                |             | 151 YRVKVVITTE  | DIKNELAKHT | FTLVCYTDDI  | KSQDITLKLQ  | LRKYVEDEPA  |
|                |             | 201 AIAERATRIS  | SFKAYEISQI | LREYTLKSGQ  | TKPAKITIVA  | QQNEYNNKLE  |
|                |             | 251 DTSTIEKVEE  | IEYKTAE    |             |             |             |
| Band 8:        | BF1298      | 1 MKKSIFMFAL    | ATLMSASVFA | QDNDAKRLPG  | YKTFEGNGF   | WNNWFMSANF  |
|                |             | 51 GAQSLFAENS   | KDAKFRNTIT | FMPTLVSGKW  | FNPYNGVRLQ  | GTGGSLHGF   |
|                |             | 101 SGANSMHYQ   | YGAVHADFMF | GLINFFAPYK  | ENRRFDIVPF  | AGIGGAFIRK  |
|                |             | 151 GDQSFITNAG  | IQARYRISKR | FDINVEYQGA  | ILDDDMVVRG  | GFPNDGISGL  |
|                |             | 201 TAQVTRFRGK  | TGFKKGYSSR | QYNAIKSNYS  | DLEANATLK   | KENAAQQAIEI |
|                |             | 251 AELKARKPEI  | VKEETVIDNS | EIKALPSTIT  | FPFNSSKIEL  | SQEVSIFFNIA |
|                |             | 301 EFLKANPEIR  | VRLTYGADKR | GSEQANRIVS  | ERRANAVTEV  | FVNYKGIADK  |
|                |             | 351 RITTEFKGTS  | TKFENDMNR  | AVVVELIK    |             |             |
| Band 7:        | BF1929      | 1 MNYLLKCLFL    | SCLLISVVAC | TDGINETVIS  | AYQLPVLPEP  | SYKFSRNGES  |
|                |             | 51 SVNVLCEGFL   | KSPIDRIFSE | YMNARMSTK   | RDYDEALRIY  | HEGNFGLKPK  |
|                |             | 101 KEVSASSKHL  | KDRDKILKDI | DANFETSARI  | AGLGANIPSY  | EHRNREAVKG  |
|                |             | 151 LTGYVNGIG   | KDKICVYDER | GIAVAEVYKY  | AIMGAIYLDK  | ILNIHLEQI   |
|                |             | 201 LENNEVLVRN  | DLTQLLPGHN | YTELEHHWDL  | AYGYDFWKT   | LAQSDGLPAL  |
|                |             | 251 KDCHLRISRS  | FVKGRAIMTT | SQYDEMRLQA  | DTIRQELSRV  | VAVRAMHLLV  |
|                |             | 301 GPNTLANLKE  | NPRRAFRLLS | QAYGLYAAQ   | FARNMQGKSF  | LTNEETGILL  |
|                |             | 351 HELEKGDGLW  | DKERLLGREQ | TEGALYNLAV  | RIGEKFDVSP  | EDIKK       |
| Band 6:        | BF2685      | 1 MKREEISYKN    | YSKLLIKLSL | LGISFIIIVSC | NKTDLITDNP  | NNELGQLPQE  |
|                |             | 51 NGITTKITITY  | SPQITRSGGD | GANDLIGYGY  | NCLYATGDNP  | NGAANKVIDL  |
|                |             | 101 KRFESGVGID  | PMTGKIKIFP | KGIIEESIMH  | GDVTATEIFE  | KSKKEFKKSI  |
|                |             | 151 SAKGKLLKGF  | LPWGGIQFSA | EYDSNFETKD  | EYSFYKMDII  | RNVRRLLYSS  |
|                |             | 201 SSIERLKYFL  | TDEFRYALKH | ASGTEIINDY  | GTHVLVDFVL  | GGKLSVWTS   |
|                |             | 251 IDHSNKKDEL  | KFKSTIKFKI | ISASASSSIS  | KSNYLKNTSL  | TILQAGGSEI  |
|                |             | 301 QAVKRYIEED  | GITNSDIFNY | KEWIKSINKE  | TSVLVASDTK  | KMIGIWEITD  |
|                |             | 351 DPKIKTKILA  | ELEKRGNNLG | IIGSKSGEIV  | TGKSTPMYKL  | QNEKTGELAK  |
|                |             | 401 APNDRGYKFP  | LYCQGEYGKE | MTGIGFMNYL  | LSYRDFQPYQ  | SAPASNDEKS  |
|                |             | 451 WSIKFTPDGY  | ITVLNKHNLK | FLCTDYKFRT  | ISEDDTNSRL  | WIPRYTLNMM  |
| 501 DDDTIQ     |             |                 |            |             |             |             |
| Band 5:        | BF0669      | 1 MKKIYKSITL    | VAAILSLSSC | GNDWLDKPA   | DGIPSEDAIT  | NYNDALTART  |
|                |             | 51 GMYDGIQNS    | NATSYGARM  | FYDGDVRAAD  | MQARTQGMRS  | SSCYEMLYTV  |
|                |             | 101 DDAPNMWNI   | YNVIRANRNL | IEATINEKVT  | DATEAQIGKI  | YSEALVVRAL  |
|                |             | 151 VHFDLVRIY   | MPYTADNGAS | LGVPVIVKPL  | ERNDLPSRNT  | VAEYTVQVIT  |
|                |             | 201 DLTDAINSGY  | LAKDQTPGYI | NEWAAKALLT  | RVYLTGQDNE  | NALKVAEDII  |
|                |             | 251 TNSPYKLWITN | EEYVNAVYKS | NGAHTNEMIF  | EVVNASNDW   | TDNRGAIYLL  |
|                |             | 301 NENGYADAIV  | TKSFMNLSQ  | DPKDVRIGMV  | LPAQYDKDLQ  | EEYGDAKIFI  |
|                |             | 351 NKFPADKDDV  | GEMRLNPLPL | LRLSEVYLSA  | AEEAAKLGGH  | QDKAAKYLNE  |
| 401 IVQRANPEAK | ATSEADATVE  | RILERRKEM       | IGEGQRYFDA | LRNNETIVRY  |             |             |
| 451 KDEGDGKYHY | SLIKESQSFD  | RTYFRALPI       | PVDETNVNP  | LRAQQNPGY   |             |             |
| Band 4:        | BF1992      | 1 MNRNLLMPVA    | VSLILLSGCK | YNDNFEGLD   | DMTQPTNLMK  | IEYTLTDADY  |
|                |             | 51 ATISSNSTNK   | KIATDAGVSK | DLENVKTNMY  | LTEKITGADY  | IPAFLLDKYY  |
|                |             | 101 TADKSSSAKI  | TYKYEAMSS  | LLSEYASVKY  | LKPTDAEYKL  | VYGENAFAPY  |
|                |             | 151 LNEKTEGQMS  | KILNEKFKDA | EKGTAVFDY   | KLGGEGLENP  | LMNQNFALP   |
|                |             | 201 TGDLEKLGW   | FISSTGDTQM | KVTSYDDNQY  | VQYSANGTKG  | ACVGMVTPA   |
|                |             | 251 ISVTAGDYLA  | FDVTVGYNA  | SCLSVLISEN  | FDGENVGTAN  | WVDVTSDFSI  |
|                |             | 301 PTKPTSGYGT  | FASAGKPLS  | AYAGKKVYVA  | FKYEGDGANK  | KTTTYIDNII  |
|                |             | 351 MVGTSIPANS  | LSTPTYAVKV | YDGNKWNKS   | NSVYVLYAD   | YDGMGQSKRY  |
| 401 FTSVPAVNY  | LPALYSKQVA  | YPVDGARVV       | VYRYNGTDL  | KIYSDEYTS   |             |             |

|                |            |            |            |             |
|----------------|------------|------------|------------|-------------|
| 451 AEKARWELNT | RIVDKTEQFV | LSDGKWNFD  | STVVTLKAEK | GDAETAIFYQ  |
| 501 TITDVIANK  | GQEYAPIFSG | KSNNEYYS   | SAYQNFDFR  | PAKWRQNA    |
| 551 AYGNMSADL  | TKLMFERLPE | AFLPGLKAIY | GSADVVEGVD | VFYTIINFAIY |
| 601 DGSSTTQYTI | KYKVTGKQF  | EYVADSLKKV | E          |             |

Band 3: BF9343\_3471

|                 |            |             |             |            |
|-----------------|------------|-------------|-------------|------------|
| 1 MKNLLYLSC     | ALMCLGFLS  | SKDDEKEIP   | PVVEDVAQY   | TGDKVKVTLG |
| 51 GEAVSGDAQI   | DLVQDDKSL  | TIKLLNIIPD  | VKEFSIPNAE  | FEATTRSAYI |
| 101 SKLSGKVSNA  | VVGVDVTFEG | VVDEGLTAS   | ITATEIKGDS  | INAKKAGLTG |
| 151 KTFKGMKTIN  | VSNIPTPIEM | EQRVYTSVVS  | KDTSAILKIKI | NDFAFQGLKL |
| 201 GDISLDTAV   | RHRGEQDGKP | IYGFKTSQE   | MTLEAVGKVL  | IDANGTIIGE |
| 251 KMELSLNVNA  | VTAGLTVGVD | FSGNIVEEST  | DTKATITVTG  | DAVAEGVTVS |
| 301 GNTYTFKWE   | STPDDQLVFI | PKIEIPATAV  | LDSIIIDNR   | NKKSVAEPPN |
| 351 TAIDFSQLKE  | NYVGYHVTP  | EDIRYPSKMM  | LKMVRIAEIN  | PVYDMATWVA |
| 401 DGFDEKPNGL  | TTSNLAFAFF | PMFGIDVPTP  | VVKASDAAE   | ITTSRTVSAT |
| 451 LPSTLVPQVT  | AGTMFLGEFK | VDITNTLKST  | HFGVPYRVKP  | VNFKITYKYT |
| 501 PGTTYFKTVV  | KNNANDTEVV | PNEKDECSIN  | AYLYEVDSYA  | ETLDGTNINT |
| 551 SNKVIMKAVL  | EDGSAKADYV | TLTIIPFKETG | NGSFDPTKKK  | YKLAIVCSSS |
| 601 KKGDDQFMGAD | GSKLWVKYLE | VTR         |             |            |

Band 2: BF638R\_4406

|                 |             |            |             |             |
|-----------------|-------------|------------|-------------|-------------|
| 1 MNLFKSSVLC    | GMVIVSFMST  | CTDVIDTMPK | GPKGDTGLSA  | YEFWKEKQVAD |
| 51 GTVNMFKDQT   | EVADFFKFLK  | GKDGKDGKDG | QSAFEQWKDM  | IASGSVDDPH  |
| 101 NPGEKWPSEN  | NTVQDFWRFL  | TGASGEDGQT | PHIGDNGNWF  | IGKEDTGIGA  |
| 151 RGRDGDQDKD  | GKDGINGRDA  | IPPTVTIGDN | GNWYINGTDT  | GKPAFGKDGK  |
| 201 DGKDGKDAVP  | PTVTIIGDNG  | WVFDGTDGK  | KAVGQDGKSP  | EVAIGDNGNW  |
| 251 YINGDITGKP  | AFGKDGKDGK  | DGKDGANGAN | GKSAYELWKE  | YISSGDVDPN  |
| 301 HNPDKQIPAD  | RNKQDFWDF   | LTGKSSVIEI | EVGKYNVIPE  | YWNSSLKEYV  |
| 351 VPSDQSVLFT  | VYDKTGKVT   | AGVKVSDLPG | VSSTDAFITN  | EEGQFKVTDY  |
| 401 KLPDNKGLSE  | RNGSVTVTVYD | KTQETSAGNT | LVPNRINVRNA | IITSAVLSNW  |
| 451 SNTSIDIYRT  | LNVYYSFERQ  | VDGEMDKYPT | SITTPYNSMK  | SARVKDINRP  |
| 501 VNEGVDKQDQ  | LVRYSNNGSY  | LYIIRPLVLT | ETEKANVAKN  | DTVGLKAKYE  |
| 551 WDQNTNYAAL  | YFGDGTGSYN  | DYQQTIYLDQ | KIHVPEVYPA  | PSFKENSVFI  |
| 601 EIKQGITMWM  | GEIDTDLQD   | FYKTYAYPTG | QKFTKEEGT   | NVMKHEPKLL  |
| 651 PASELEENRA  | VFIEMRTFIN  | GTGGTVHTGS | KPLSTGGKRF  | KLSTYPNW    |
| 701 IGLDIRRRTTE | STDKITYNIS  | NEYRGRYAYY | LLKEEDKYLL  | VDFADWSKRM  |
| 751 PLPIKDCPVD  | WMN         |            |             |             |

Band 1: BF3307

|                 |            |             |             |             |
|-----------------|------------|-------------|-------------|-------------|
| 1 MKQVNLRVCR    | MILPLFLGFL | LSLSAYAQQV  | SVKGHVKDST  | GEPIGANVV   |
| 51 VKDNSSIGTI   | TDLNGNFVLS | VPQNSTLVIS  | FIGYKPVEMK  | AAPSVTVTLH  |
| 101 EDAVMLQEAV  | VIGYGVTKKN | DVTGSVMAID  | ADKMKVGMAT  | SASDLLVGKA  |
| 151 AGVSVITDGG  | APGAGATIRV | RGSSSMSASN  | DPLIVIDGVP  | VDNTEIKGMG  |
| 201 NPLSTVHPND  | IETFTILKDA | SATAIYGSRA  | SNGVJIIITTK | KGQSGRVKVD  |
| 251 YSGTFSISTK  | SNTVDVMKAE | DFRNFVIEKF  | GENSLQANAL  | GKSTDMQDE   |
| 301 IFRTAFTSDH  | NVSVSGAVPH | MPYRVSVAYT  | NENGLKTSN   | MQRLTGAINL  |
| 351 NPNFFDKKLN  | IQLNVKGVYN | KNRFADRAAI  | GLATQYDPTQ  | PVYMEGNPYG  |
| 401 NGYFMYMKQE  | GDKASPIDIG | LANPVMALLE  | KDDKSTVYRS  | IGNAQIDYKF  |
| 451 HFLPELRANL  | NLGYDVSXSK | GDVLIADNSP  | LYCTGNFKN   | GFGENSHYQ   |
| 501 LKRNTLLDFY  | LNYANTFGVN | YIDVMAGYSW  | QHFYNSTTNS  | YPYSAAYA EK |
| 551 TGEFFYKKG   | DYASESYLVS | FFGRLLNYTLL | NRYLVTFTLR  | NDGSSRFSPD  |
| 601 NRWGLFPSVA  | LAWKLNEESF | LKNVNAISDL  | KLRLGYGVGTG | QQNLGNGDYP  |
| 651 YMARYMYSKA  | GANYFYGDE  | YSLIAPQPYD  | QNLKWEETTT  | WNVGIDYGFL  |
| 701 NGRITGTIDY  | YFRKTKDLLN | TVTAPAGTNF  | SNQLLTVNGT  | LENKGFESI   |
| 751 NAHAVSTQDW  | NNWIGNYISY | NKNKITKMTF  | NDDPNYAGVI  | HGGIDGGTGY  |
| 801 NALIHVRGEA  | FNSFYVFEQI | YGPDKPIEG   | AYVDQGNQ    | INDADLICFK  |
| 851 KAAPDVFMGL  | TSQLSYKND  | FSFALRGSFG  | NYVYNNVQSN  | REAYEGANNY  |
| 901 DQTGFLKNRL  | TSARSTDFKN | AQYRSSYYVQ  | NASFVRMDNI  | SLGYTFNKL F |
| 951 NDKQ SARVYA | TVQNPVITK  | YKGLDPEISG  | EGIDNNIYPR  | PRVFMIGLNL  |

1001

Table S2. Comparison of the secretome of wild-type ETBF and isogenic *fpn-* strains by quantitative mass spectrometry

| Ratio ( <i>fpn-</i> / <i>WT</i> ) Protein Abundance |                   | KEGG ID  | Predicted Function                                 | Category                 | Size (kD) | Signal peptide | PFAM Domains                                               | InterPro Domains                                          | pSORT localization (score)                       | SP /SP II cleavage site |
|-----------------------------------------------------|-------------------|----------|----------------------------------------------------|--------------------------|-----------|----------------|------------------------------------------------------------|-----------------------------------------------------------|--------------------------------------------------|-------------------------|
|                                                     |                   |          |                                                    |                          |           | +              |                                                            |                                                           |                                                  |                         |
| 0.006                                               | BF1567            | DUF 5074 | Bacteroidetes specific, PKD domain                 | Bacteroidetes specific   | 50.6      | Yes            | PF16819:PFam:entry name:DUF5074:match status:1:            | IPR031815:InterPro:entry name:DUF5074:                    | Unknown                                          | Spl                     |
| 0.006                                               | BF3230            | DUF 2807 | Trimeric autotransporter like adhesin              | Adhesin                  | 34.0      | Yes            | PF10988:PFam:entry name:DUF2807:match status:1:            | IPR021255:InterPro:entry name:DUF2807:                    | Extracellular 9.65                               | Spl                     |
| 0.008                                               | BF0506            |          | Uncharacterized protein                            | Unknown                  | 49.8      | Yes            |                                                            |                                                           | Extracellular 9.65                               | Spl                     |
| 0.008                                               | BF1992            | DUF 5017 | Unknown                                            | Unknown                  | 70.3      |                | PF16409:PFam:entry name:DUF5017:match status:1:            | IPR032185:InterPro:entry name:DUF5017:                    | Unknown                                          | Spl                     |
| 0.009                                               | BF0090            | DUF 3836 | Bacteroidales specific                             | Bacteroidetes specific   | 15.3      | Yes            | PF12930:PFam:entry name:DUF3836:match status:1:            | IPR024339:InterPro:entry name:DUF3836:                    | Unknown                                          | Spl                     |
| 0.011                                               | BF4025            |          | Uncharacterized protein                            | Unknown                  | 95.8      |                |                                                            |                                                           | Unknown                                          | x                       |
| 0.011                                               | BF2542            |          | Uncharacterized protein                            | Unknown                  | 16.8      |                |                                                            |                                                           | Unknown                                          | Spl                     |
| 0.011                                               | BF1424            |          | Putative quinoprotein amine dehydrogenase          | Enzyme, Other            | 37.6      | Yes            |                                                            | IPR011044:InterPro:entry name:Quino_amine_DH_bsu:         | Unknown                                          | Spl                     |
| 0.012                                               | BF1637            |          | Uncharacterized protein                            | Unknown                  | 16.8      | Yes            |                                                            |                                                           | Unknown                                          | Spl                     |
| 0.014                                               | BF2685            |          | MACPF domain, bacteriocin-like, pore forming       | MACPF domain             | 57.1      |                | PF01823:PFam:entry name:MACPF:match status:1:              | IPR020864:InterPro:entry name:MACPF:                      | Unknown                                          | Spl                     |
| 0.014                                               | BF2541            |          | Uncharacterized protein                            | Unknown                  | 15.5      |                |                                                            |                                                           | Unknown                                          | Spl                     |
| 0.014                                               | BF9343_1295       |          | Uncharacterized protein                            | Unknown                  | 43.3      |                |                                                            |                                                           | Unknown                                          | Spl                     |
| 0.016                                               | BF1524            |          | Uncharacterized protein                            | Unknown                  | 13.9      | Yes            |                                                            |                                                           | Unknown                                          | Spl                     |
| 0.016                                               | BF9343_2214       |          | Putative lipoprotein                               | Lipoprotein              | 21.9      | Yes            |                                                            |                                                           | Unknown                                          | Spl                     |
| 0.016                                               | BF4024            |          | Mfa2 Fimbrillin_C                                  | Fimbriae                 | 59.0      |                | PF08842:PFam:entry name:Mfa2:match status:1:match status 1 | IPR014941:InterPro:entry name:FimA_assoc_Mfa1/Mfa2:       | Unknown                                          | Spl                     |
| 0.017                                               | BF2686            |          | Lipocalin-like, extracellular, pro-inflammatory    | Lipocalin                | 30.2      | Yes            | PF13944:PFam:entry name:Calycin_like:match status:1:       | IPR024311:InterPro:entry name:Lipocalin-like:             | OuterMembrane 9.52                               | Spl                     |
| 0.020                                               | BF4311            |          | Uncharacterized protein                            | Unknown                  | 45.7      |                |                                                            |                                                           | Unknown                                          | Spl                     |
| 0.021                                               | BF638R_1207       |          | Putative lipoprotein                               | Lipoprotein              | 54.1      | Yes            |                                                            |                                                           | Unknown                                          | Spl                     |
| 0.021                                               | pBFP35 orf2*      |          | Putative integral membrane protein                 | Membrane, Other          | 22.3      |                |                                                            |                                                           | Unknown                                          | x                       |
| 0.022                                               | BF9343_2956       |          | Putative lipoprotein                               | Lipoprotein              | 29.5      | Yes            |                                                            |                                                           | Unknown                                          | Spl                     |
| 0.023                                               | BF1209            | DUF 4252 | Unknown                                            | Unknown                  | 26.0      | Yes            | PF14060:PFam:entry name:DUF4252:match status:1:            | IPR025348:InterPro:entry name:DUF4252:                    | Unknown (may have multiple localization sites.)  | Spl                     |
| 0.024                                               | BF4030            |          | Uncharacterized protein                            | Unknown                  | 34.3      |                |                                                            |                                                           | Unknown                                          | x                       |
| 0.024                                               | HMPREF1080_03218* |          | SusD, TPR domain                                   | SusD-like                | 77.9      |                | PF07980:PFam:entry name:SusD:match status:1:               | IPR011990:InterPro:entry name:TPR-like_helical_dom:       | Unknown                                          | x                       |
| 0.025                                               | BF4433            | DUF 5305 | Unknown                                            | Unknown                  | 37.2      | Yes            | PF17231:pfam:entry name:DUF5305:match status:1:            | IPR035185:InterPro:entry name:DUF5305                     | Extracellular 9.65                               | Spl                     |
| 0.025                                               | BF638R_4428       |          | Putative lipoprotein                               | Lipoprotein              | 28.6      | Yes            |                                                            |                                                           | Unknown                                          | Spl                     |
| 0.026                                               | BF1680            | DUF 3869 | 3XOG-like, putative adhesin                        | Adhesin                  | 37.6      | Yes            | PF12985:PFam:entry name:DUF3869:match status:1:            | IPR008969:InterPro:entry name:CarboxyPept-like_regulatory | Unknown                                          | Spl                     |
| 0.026                                               | pBFP35 orf1*      |          | Hypothetical lipoprotein                           | Lipoprotein              | 28.6      |                |                                                            |                                                           | Extracellular 9.65                               | Spl                     |
| 0.027                                               | BF9343_3469       |          | Putative exported protein, PCMD domain, carbol     | Carbohydrate utilization | 40.1      | Yes            | PF13201:PFam:entry name:PCMD:match status:1:               | IPR025112:InterPro:entry name:PCMD:                       | Unknown                                          | Spl                     |
| 0.031                                               | BF0970            |          | SusD, TPR domain                                   | SusD-like                | 77.2      | Yes            | PF07980:PFam:entry name:SusD:match status:1:               | IPR011990:InterPro:entry name:TPR-like_helical_dom:       | Unknown (may have multiple localization sites.)  | Spl                     |
| 0.032                                               | BF1909            |          | Peptidase_S41 domain, PDZ domain                   | Protease                 | 47.7      |                | PF03572:PFam:entry name:Peptidase_S41:match status:1:      | IPR001478:InterPro:entry name:PDZ:                        | Unknown                                          | Spl                     |
| 0.033                                               | BF1257            |          | Endo/exonuclease/phosphatase domains               | Enzyme, Other            | 38.1      |                | PF03372:PFam:entry name:Exo_endo_phos:match status:1:      | IPR005135:InterPro:entry name:Endo/exonuclease/phospha:   | Unknown                                          | x                       |
| 0.033                                               | BF1926            |          | Peptidase_Mx1, metalloprotease                     | Protease                 | 38.9      | Yes            | PF15890:PFam:entry name:Peptidase_Mx1:match status:1:      | IPR030890:InterPro:entry name:LP_HEXxH_w_tonB:            | Unknown (may have multiple localization sites.)  | Spl                     |
| 0.034                                               | BF1330            |          | Exo-alpha sialidase                                | Carbohydrate utilization | 37.3      | Yes            | PF08522:PFam:entry name:DUF1735:match status:1:            | IPR011048:InterPro:entry name:Haem_d1:                    | OuterMembrane 9.49                               | Spl                     |
| 0.037                                               | BF1568            |          | Uncharacterized protein                            | Unknown                  | 75.2      |                |                                                            |                                                           | Unknown                                          | Spl                     |
| 0.038                                               | BF1329            | DUF 1735 | acylhydrolase                                      | Enzyme, Other            | 42.1      |                | PF08522:PFam:entry name:DUF1735:match status:1:            | IPR013728:InterPro:entry name:DUF1735:                    | Unknown                                          | Spl                     |
| 0.038                                               | BF3877            |          | Uncharacterized protein                            | Unknown                  | 13.0      | Yes            |                                                            |                                                           | Unknown                                          | Spl                     |
| 0.038                                               | BF1034            |          | LolA_2 Bacteroides outer membrane lipoprotein      | Lipoprotein              | 24.2      | Yes            | PF16584:PFam:entry name:LolA_2:match status:1:             | IPR029046:InterPro:entry name:LolA/LolB/LppX:             | Unknown                                          | Spl                     |
| 0.038                                               | BF3899            | DUF 4827 | Bacteroides specific                               | Bacteroidetes specific   | 24.5      | Yes            | PF16109:PFam:entry name:DUF4827:match status:1:            | IPR023252:InterPro:entry name:DUF4827:                    | Unknown                                          | Spl                     |
| 0.040                                               | BF9343_3471       |          | PCMD domain, carbohydrate binding                  | Carbohydrate utilization | 67.7      | Yes            | PF13201:PFam:entry name:PCMD:match status:1:               | IPR025112:InterPro:entry name:PCMD:                       | Unknown                                          | Spl                     |
| 0.041                                               | BF1675            |          | CarboxypepD_reg CarbopepD_reg_2                    | Carbohydrate utilization | 79.0      | Yes            | PF13620:PFam:entry name:CarboxypepD:match status:1:        | IPR013784:InterPro:entry name:Carb-bd-like_fold:          | Unknown                                          | Spl                     |
| 0.043                                               | BF4449            |          | Putative outer membrane protein probably invol     | SusD-like                | 75.6      | Yes            | PF07980:PFam:entry name:SusD:match status:1:               | IPR011990:InterPro:entry name:TPR-like_helical_dom:       | Unknown                                          | Spl                     |
| 0.043                                               | BF4299            | DUF 1349 | Unknown                                            | Unknown                  | 25.3      | Yes            | PF07081:PFam:entry name:DUF1349:match status:1:            | IPR015987:InterPro:entry name:UCP022704:                  | Unknown                                          | Spl                     |
| 0.043                                               | BF1955            |          | TssC                                               | Other                    | 52.2      |                |                                                            |                                                           | Unknown (may have multiple localization sites.)  | x                       |
| 0.044                                               | BF0772            |          | NigD-like, Bacteroides specific, lipoprotein, puts | NigD like                | 27.9      | Yes            | PF12667:PFam:entry name:NigD:match status:1:               | IPR024299:InterPro:entry name:NigD-like:                  | Unknown ( may have multiple localization sites.) | Spl                     |
| 0.044                                               | BF0965            |          | Lipocalin-like, Bacteroides specific               | Lipocalin                | 19.2      | Yes            | PF16139:PFam:entry name:DUF4847:match status:1:            | IPR023216:InterPro:entry name:DUF4847:                    | Unknown                                          | Spl                     |
| 0.045                                               | BF4461            |          | Putative outer membrane protein probably invol     | SusD-like                | 77.1      | Yes            | PF07980:PFam:entry name:SusD:match status:1:               | IPR011990:InterPro:entry name:TPR-like_helical_dom:       | Unknown                                          | Spl                     |
| 0.045                                               | BF0947            |          | Possible outer membrane protein, SusD like, Ra     | SusD-like                | 66.6      |                | PF07980:PFam:entry name:SusD:match status:1:               | IPR012944:InterPro:entry name:SusD_RagB_dom:              | Unknown                                          | Spl                     |
| 0.047                                               | BF3740            |          | TolR, iron uptake TBDR                             | TBDR                     | 22.4      |                | PF02472:PFam:entry name:ExbD:match status:1:               | IPR003400:InterPro:entry name:ExbD:                       | Unknown                                          | x                       |
| 0.048                                               | BF0702            |          | Peptidase M43, metalloprotease, Bacteroides        | Protease                 | 40.6      |                | PF05572:PFam:entry name:Peptidase_M43:match status:1:      | IPR023852:InterPro:entry name:Metalloprotease_lipop_Bf    | Unknown                                          | x                       |
| 0.048                                               | BF1925            |          | SusD like, TPR domain                              | SusD-like                | 58.3      |                | PF07980:PFam:entry name:SusD:match status:1:               | IPR011990:InterPro:entry name:TPR-like_helical_dom:       | OuterMembrane 9.52                               | Spl                     |
| 0.048                                               | BF0393            |          | SusD-like, TPR domain                              | SusD-like                | 56.8      | Yes            | PF07980:PFam:entry name:SusD:match status:1:               | IPR011990:InterPro:entry name:TPR-like_helical_dom:       | Unknown                                          | Spl                     |
| 0.050                                               | BF3274            | DUF3836  | Bacteroidales specific                             | Bacteroidetes specific   | 19.6      | Yes            | PF12930:PFam:entry name:DUF3836:match status:1:            | IPR024339:InterPro:entry name:DUF3836:                    | Unknown                                          | Spl                     |
| 0.050                                               | BF4129            |          | Putative TPR-repeat family protein                 | TPR                      | 53.5      | Yes            | PF13414:PFam:entry name:TPR_11:match status:1:             | IPR019734:InterPro:entry name:TPR_repeat:                 | Unknown                                          | Spl                     |
| 0.050                                               | BF1724            |          | SusD like, Rag B like                              | SusD-like                | 58.6      |                | PF07980:PFam:entry name:SusD:match status:1:               | IPR012944:InterPro:entry name:SusD_RagB_dom:              | Unknown                                          | x                       |
| 0.051                                               | BF1723            |          | Putative outer membrane protein probably invol     | SusD-like                | 59.2      | Yes            | PF07980:PFam:entry name:SusD:match status:1:               | IPR011990:InterPro:entry name:TPR-like_helical_dom:       | Unknown                                          | Spl                     |
| 0.051                                               | BF1748            |          | LRR domain, common cell surface domain             | LRR domain               | 38.9      | Yes            | PF13306:PFam:entry name:LRR_S:match status:2:              | IPR022675:InterPro:entry name:LRR_dom-like:               | Unknown (may have multiple localization sites.)  | Spl                     |
| 0.052                                               | BF3757            |          | IgG-like fold, collagen like protein               | Adhesin                  | 71.6      | Yes            | PF16130:PFam:entry name:DUF4842:match status:1:            | IPR032295:InterPro:entry name:DUF4842:                    | Unknown                                          | Spl                     |
| 0.052                                               | BF1634            |          | MACPF domain, bacteriocin like, pore forming       | MACPF domain             | 41.0      | Yes            | PF01823:PFam:entry name:MACPF:match status:1:              | IPR020864:InterPro:entry name:MACPF:                      | Unknown                                          | Spl                     |
| 0.052                                               | BF1929            |          | DUF4856 Bacteroides specific                       | Bacteroidetes specific   | 44.9      | Yes            | PF16148:PFam:entry name:DUF4856:match status:1:            | IPR023231:InterPro:entry name:DUF4856:                    | Unknown (may have multiple localization sites.)  | Spl                     |
| 0.052                                               | BF1074            |          | TPR domain                                         | TPR                      | 48.1      |                |                                                            | IPR013026:InterPro:entry name:TPR_contain_dom:            | Unknown                                          | Spl                     |
| 0.052                                               | BF0590            |          | NigD-like, Bacteroides specific, lipoprotein, puts | NigD like                | 27.6      | Yes            | PF12667:PFam:entry name:NigD:match status:1:               | IPR024299:InterPro:entry name:NigD-like:                  | Unknown                                          | Spl                     |
| 0.056                                               | BF0408            |          | Putative outer membrane protein probably invol     | SusD-like                | 54.6      | Yes            | PF07980:PFam:entry name:SusD:match status:1:               | IPR011990:InterPro:entry name:TPR-like_helical_dom:       | Unknown                                          | Spl                     |
| 0.057                                               | BF638R_0923       |          | Putative outer membrane protein, SusD like, Ra     | SusD-like                | 61.7      |                | PF07980:PFam:entry name:SusD:match status:1:               | IPR012944:InterPro:entry name:SusD_RagB_dom:              | Unknown                                          | Spl                     |
| 0.057                                               | BF9343_1425       |          | Fimbrillin-like, adhesion, gut microbiome enhar    | Fimbriae                 | 69.2      |                | PF13149:PFam:entry name:Mfa_like_1:match status:1:         | IPR025049:InterPro:entry name:Mfa_like_1:                 | Unknown                                          | Spl                     |
| 0.059                                               | BF9343_2885       |          | Putative lipoprotein, Ig-like, putative adhesin    | Lipoprotein, Adhesin     | 43.0      |                |                                                            |                                                           | Unknown (may have multiple localization sites.)  | Spl                     |
| 0.060                                               | BF1261            |          | DUF 4890 Bacteroides specific                      | Bacteroidetes specific   | 18.0      | Yes            | PF16231:PFam:entry name:DUF4890:match status:1:            | IPR032612:InterPro:entry name:DUF4890:                    | Unknown                                          | Spl                     |
| 0.061                                               | BF0669            |          | SusD like, TPR domain                              | SusD-like                | 56.2      | Yes            | PF07980:PFam:entry name:SusD:match status:1:               | IPR011990:InterPro:entry name:TPR-like_helical_dom:       | Unknown (may have multiple localization sites.)  | Spl                     |
| 0.061                                               | BF1714            |          | Putative outer membrane protein probably invol     | SusD-like                | 60.7      | Yes            | PF07980:PFam:entry name:SusD:match status:1:               | IPR011990:InterPro:entry name:TPR-like_helical_dom:       | Unknown                                          | Spl                     |
| 0.062                                               | BF1335            |          | NigD-like, Bacteroides specific, lipoprotein, puts | NigD like                | 28.1      | Yes            | PF12667:PFam:entry name:NigD:match status:1:               | IPR024299:InterPro:entry name:NigD-like:                  | Unknown                                          | Spl                     |
| 0.062                                               | BF9343_1939       |          | TssD                                               | Other                    | 16.1      |                | PF17642:PFam:entry name:TssD:match status:1:               | Unknown                                                   | Unknown                                          | x                       |
| 0.063                                               | BF3194            |          | Stress responsive A/B barrel                       | Other                    | 11.3      |                | PF07876:PFam:entry name:Dabb:match status:1:               | IPR013097:InterPro:entry name:Dabb:                       | Unknown                                          | x                       |
| 0.064                                               | BF2738            |          | Putative periplasmic protein                       | Inhibitor, Other         | 16.7      | Yes            | PF11396:PFam:entry name:PepsY_like:match status:1:         | IPR021533:InterPro:entry name:PepsY_like:                 | Unknown                                          | Spl                     |
| 0.064                                               | BF4082            |          | Putative RNA-binding protein RbpA                  | Other                    | 8.9       |                | PF00076:PFam:entry name:RRM_1:match status:1:              | IPR000504:InterPro:entry name:RRM_dom:                    | Unknown                                          | x                       |
| 0.064                                               | BF1451            |          | DUF4468                                            | Unknown                  | 39.8      | Yes            | PF14730:PFam:entry name:DUF4468:match status:1:            | IPR027823:InterPro:entry name:DUF4468:                    | Unknown                                          | Spl                     |
| 0.065                                               | BF1711            |          | Putative outer membrane protein probably invol     | SusD-like                | 59.2      | Yes            | PF07980:PFam:entry name:SusD:match status:1:               | IPR011990:InterPro:entry name:TPR-like_helical_dom:       | Unknown                                          | Spl                     |

|       |             |                                                             |                          |       |     |                                                         |                                                            |                                                 |     |
|-------|-------------|-------------------------------------------------------------|--------------------------|-------|-----|---------------------------------------------------------|------------------------------------------------------------|-------------------------------------------------|-----|
| 0.065 | BF1655      | Aldose-1-epimerase, carbohydrate binding                    | Carbohydrate utilization | 40.2  |     | PF01263:Pfam:entry name:Aldose_epim:match status:1:     | IPR014718:InterPro:entry name:Glyco_hydro-type_carb-bd_    | Unknown (may have multiple localization sites.) | x   |
| 0.069 | BF0492      | NigD-like, Bacteroides specific, lipoprotein, putative      | NigD-like                | 26.1  |     | PF12667:Pfam:entry name:NigD:match status:1:            | IPR024299:InterPro:entry name:NigD-like:                   | Unknown (may have multiple localization sites.) | Spl |
| 0.069 | BF9343_4231 | Fimbrillin-like, adhesion, gut microbiome enhancer          | Fimbrae                  | 35.5  |     | PF13149:Pfam:entry name:Mfa_1k_1:match status:1:        | IPR025049:InterPro:entry name:Mfa_1k_1:                    | Extracellular 9.64                              | Spl |
| 0.070 | BF3295      | Alpha-amylase                                               | Carbohydrate utilization | 70.9  | Yes | PF10438:Pfam:entry name:Cyc_maltodex_C:match status:1:  | IPR015902:InterPro:entry name:Glyco_hydro_13:              | Unknown (may have multiple localization sites.) | Spl |
| 0.073 | BF0953      | Putative outer membrane protein probably involved           | SusD-like                | 67.8  |     | PF07980:Pfam:entry name:SusD:match status:1:            | IPR011990:InterPro:entry name:TPR-like_helical_dom:        | Unknown (may have multiple localization sites.) | Spl |
| 0.074 | BF4430      | Uncharacterized protein                                     | Unknown                  | 160.7 | Yes |                                                         |                                                            | Unknown (may have multiple localization sites.) | Spl |
| 0.074 | BF3787      | Putative chitinase                                          | Carbohydrate utilization | 48.2  |     | PF08522:Pfam:entry name:DUF1735:match status:2:         | IPR008979:InterPro:entry name:Galactose-bd-like:           | Unknown (may have multiple localization sites.) | Spl |
| 0.075 | BF6388_4424 | FimA, P. gingivalis, adhesion, virulence                    | Fimbrae                  | 122.2 | Yes | PF06321:Pfam:entry name:P_gingi_FimA:match status:1:    | IPR029141:InterPro:entry name:FimA_N:                      | Unknown                                         | Spl |
| 0.076 | BF2036      | Putative xylanase                                           | Carbohydrate utilization | 28.7  | Yes | PF07313:Pfam:entry name:DUF1460:match status:1:         | IPR023360:InterPro:entry name:Put_xylanase-like_C          | Unknown (may have multiple localization sites.) | Spl |
| 0.076 | BF2976      | Tetrapeptide repeat family protein                          | TPR                      | 62.8  | Yes | PF07179:Pfam:entry name:TPR_2:match status:1:           | IPR011990:InterPro:entry name:TPR-like_helical_dom:        | Unknown                                         | Spl |
| 0.079 | BF2725      | Uncharacterized protein                                     | Unknown                  | 24.8  | Yes |                                                         |                                                            | Unknown (may have multiple localization sites.) | Spl |
| 0.079 | BF1254      | SusD-like_2 SusD-like SusD-like_3                           | SusD-like                | 57.9  | Yes | PF12771:Pfam:entry name:SusD-like:match status:1:       | IPR011990:InterPro:entry name:TPR-like_helical_dom:        | Unknown                                         | Spl |
| 0.079 | BF2640      | Putative glycerophosphodiester phosphodiester:Enzyme, Other | Enzyme, Other            | 28.5  | Yes | PF03009:Pfam:entry name:GDP:match status:1:             | IPR017946:InterPro:entry name:PLC-like_Pdiesterase_TIM-b   | Unknown (may have multiple localization sites.) | Spl |
| 0.082 | BF3228      | Putative lipoprotein DUF 4876                               | Lipoprotein              | 44.6  | Yes | PF16215:Pfam:entry name:DUF4876:match status:1:         | IPR032627:InterPro:entry name:DUF4876:                     | Unknown                                         | Spl |
| 0.083 | BF2267      | RNA binding protein                                         | Other                    | 9.1   |     | PF0076:Pfam:entry name:RRM_1:match status:1:            | IPR000504:InterPro:entry name:RRM_dom:                     | Unknown                                         | x   |
| 0.085 | BF0886      | Putative glycosylhydrolase                                  | Carbohydrate utilization | 51.4  | Yes | PF01120:Pfam:entry name:Alpha_L_fucos:match status:1:   | IPR000933:InterPro:entry name:Glyco_hydro_29:              | Unknown                                         | Spl |
| 0.085 | BF3905      | Sua5/Yco/YrdC/YwIC family protein                           | Other                    | 19.4  |     | PF01300:Pfam:entry name:Sua5_yco_yrdC:match status:1:   | IPR006070:InterPro:entry name:YrdC-like_dom:               | Unknown                                         | x   |
| 0.086 | BF3075      | Protease/ glutamine aminotransferase                        | Protease                 | 21.8  |     | PF01965:Pfam:entry name:Di_1_Ppl:match status:1:        | IPR029062:InterPro:entry name:Class_I_gatase-like:         | Unknown                                         | x   |
| 0.087 | BF1328      | Putative secreted endoglycosidase                           | Carbohydrate utilization | 39.5  | Yes | PF16141:Pfam:entry name:DUF4849:match status:1:         | IPR013781:InterPro:entry name:Glyco_hydro_catalytic_dom    | Extracellular 9.71                              | Spl |
| 0.087 | BF4473      | Putative outer membrane protein probably involved           | SusD-like                | 73.7  | Yes | PF07980:Pfam:entry name:SusD:match status:1:            | IPR012944:InterPro:entry name:SusD_RagB_dom:               | Unknown                                         | Spl |
| 0.090 | BF0192      | Glycoside hydrolase family 2, beta galactosidase            | Carbohydrate utilization | 118.2 | Yes | PF00703:Pfam:entry name:Glyco_hydro_2:match status:1:   | IPR023312:InterPro:entry name:LaC2_4:                      | Unknown                                         | Spl |
| 0.092 | BF0751      | SusD-like SusD-like_2                                       | SusD-like                | 66.2  | Yes | PF12741:Pfam:entry name:SusD-like:match status:1:       | IPR011990:InterPro:entry name:TPR-like_helical_dom:        | Unknown                                         | Spl |
| 0.092 | BF0727      | Aminopeptidase                                              | Protease                 | 37.6  | Yes | PF04389:Pfam:entry name:Peptidase_M28:match status:1:   | IPR007484:InterPro:entry name:Peptidase_M28:               | Extracellular 9.71                              | Spl |
| 0.093 | BF3375      | Beta-galactosidase                                          | Carbohydrate utilization | 150.6 | Yes | PF02929:Pfam:entry name:Bgal_small_N:match status:1:    | IPR006102:InterPro:entry name:Glyco_hydro_2_lg-like:       | OuterMembrane 9.49                              | Spl |
| 0.093 | BF0439      | SusD like, RagB like                                        | SusD-like                | 63.7  |     | PF07980:Pfam:entry name:SusD:match status:1:            | IPR012944:InterPro:entry name:SusD_RagB_dom:               | Unknown                                         | Spl |
| 0.094 | BF0287      | Alpha-galactosidase                                         | Carbohydrate utilization | 82.2  | Yes | PF16875:Pfam:entry name:Glyco_hydro_36N:match status:1: | IPR013705:InterPro:entry name:Glyco_hydro_36_C:            | Unknown (may have multiple localization sites.) | Spl |
| 0.096 | BF1332      | Glycosyl hydrolase, mannin catalysis                        | Carbohydrate utilization | 37.5  |     | PF04041:Pfam:entry name:DUF377:match status:1:          | IPR023296:InterPro:entry name:Glyco_hydro_beta-prop:       | Unknown                                         | x   |
| 0.096 | BF9343_2925 | DPP-7 like, cell surface serine protease, P. gingivalis     | Protease                 | 81.5  | Yes | PF10459:Pfam:entry name:Peptidase_S46:match status:1:   | IPR019500:InterPro:entry name:Pep_S46:                     | Unknown (may have multiple localization sites.) | Spl |
| 0.098 | BF2230      | Putative phosphatidylinositol-4-phosphate 5-kinase          | Enzyme, Other            | 44.0  | Yes | PF02493:Pfam:entry name:MDRN:match status:14:           | IPR003409:InterPro:entry name:MORN:                        | Unknown                                         | Spl |
| 0.100 | BF0503      | Cationic outer membrane protein OmpH                        | OMP                      | 19.2  | Yes | PF03938:Pfam:entry name:OmpH:match status:1:            | IPR005632:InterPro:entry name:Chaperone_Skp:               | Unknown                                         | Spl |
| 0.100 | BF1087      | Uncharacterized protein Bacteroides specific                | Bacteroidetes specific   | 39.0  | Yes | PF16115:Pfam:entry name:DUF4831:match status:1:         | IPR032265:InterPro:entry name:DUF4831:                     | Unknown                                         | Spl |
| 0.101 | BF3420      | Alpha-L-fucosidase                                          | Carbohydrate utilization | 49.5  | Yes | PF01120:Pfam:entry name:Alpha_L_fucos:match status:1:   | IPR017853:InterPro:entry name:Glycoside_hydrolase_SF:      | Unknown                                         | Spl |
| 0.106 | BF3304      | Alpha-amylase                                               | Carbohydrate utilization | 106.7 |     | PF00128:Pfam:entry name:Alpha-amylase:match status:2:   | IPR013781:InterPro:entry name:Glyco_hydro_catalytic_dom    | Unknown (may have multiple localization sites.) | Spl |
| 0.106 | BF9343_1339 | Putative dipeptidase                                        | Protease                 | 61.5  | Yes | PF03577:Pfam:entry name:Peptidase_C69:match status:2:   | IPR005322:InterPro:entry name:Peptidase_C69:               | Unknown                                         | Spl |
| 0.106 | BF9343_1408 | Fimbrillin-like, adhesion, gut microbiome enhancer          | Fimbrae                  | 34.6  | Yes | PF13149:Pfam:entry name:Mfa_1k_1:match status:1:        | IPR025049:InterPro:entry name:Mfa_1k_1:                    | Unknown                                         | Spl |
| 0.107 | BF3122      | Uncharacterized protein                                     | Unknown                  | 12.2  |     |                                                         |                                                            | Unknown                                         | x   |
| 0.114 | BF2010      | Putative aminopeptidase C                                   | Protease                 | 53.1  | Yes | PF03051:Pfam:entry name:Peptidase_C1_2:match status:1:  | IPR004134:InterPro:entry name:Peptidase_C1B:               | Unknown (may have multiple localization sites.) | Spl |
| 0.114 | BF1616      | Uncharacterized protein                                     | Unknown                  | 60.5  | Yes |                                                         |                                                            | Unknown                                         | Spl |
| 0.116 | BF1785      | Uncharacterized protein Bacteroides specific                | Bacteroidetes specific   | 59.3  | Yes | PF16432:Pfam:entry name:DUF5029:match status:1:         | IPR032210:InterPro:entry name:DUF5029:                     | Unknown                                         | Spl |
| 0.117 | BF2283      | DUF3332                                                     | Unknown                  | 19.9  |     | PF11810:Pfam:entry name:DUF3332:match status:1:         | IPR021768:InterPro:entry name:DUF3332:                     | Unknown                                         | x   |
| 0.117 | BF4420      | Ig-like fold, putative adhesion                             | Adhesion                 | 36.5  |     | PF16130:Pfam:entry name:DUF4842:match status:1:         | IPR032295:InterPro:entry name:DUF4842:                     | Unknown                                         | Spl |
| 0.121 | BF3780      | Putative outer membrane protein probably involved           | SusD-like                | 68.2  | Yes | PF07980:Pfam:entry name:SusD:match status:1:            | IPR012944:InterPro:entry name:SusD_RagB_dom:               | Unknown (may have multiple localization sites.) | Spl |
| 0.122 | BF4322      | Putative mannose-1-phosphate guanylyltransferase            | Carbohydrate utilization | 40.5  |     | PF00483:Pfam:entry name:ntp_transferase:match status:1: | IPR029044:InterPro:entry name:Nucleotide-diphosphate_tra   | Unknown                                         | x   |
| 0.122 | BF2948      | Uncharacterized protein DUF 4494                            | Unknown                  | 17.6  |     | PF14902:Pfam:entry name:DUF4494:match status:1:         | IPR027848:InterPro:entry name:DUF4494:                     | Unknown                                         | x   |
| 0.123 | BF1858      | Putative xylanase                                           | Carbohydrate utilization | 80.3  |     | PF06452:Pfam:entry name:CBM9_1:match status:1:          | IPR010502:InterPro:entry name:Carb-bd_dom_fam9:            | Unknown (may have multiple localization sites.) | Spl |
| 0.125 | BF3871      | Uncharacterized protein                                     | Unknown                  | 16.3  | Yes |                                                         |                                                            | Unknown                                         | Spl |
| 0.127 | BF3892      | Putative hydrogenase                                        | Enzyme, Other            | 54.4  |     | PF02906:Pfam:entry name:Fe_hyd_lg_C:match status:1:     | IPR004108:InterPro:entry name:Fe_hydrogenase_lsu_C:        | Unknown (may have multiple localization sites.) | x   |
| 0.129 | BF1895      | SusD like                                                   | SusD-like                | 71.3  | Yes | PF12741:Pfam:entry name:SusD-like:match status:1:       | IPR024302:InterPro:entry name:SusD-like:                   | OuterMembrane 9.52                              | Spl |
| 0.133 | BF4026      | Putative outer membrane protein, TolB like                  | OMP                      | 88.2  |     | PF03160:Pfam:entry name:Calx-beta:match status:3:       | IPR011042:InterPro:entry name:6-blade_b-propeller_TolB-III | Unknown                                         | Spl |
| 0.133 | BF2440      | Uncharacterized protein                                     | Unknown                  | 46.3  |     |                                                         |                                                            | Unknown (may have multiple localization sites.) | Spl |
| 0.137 | BF4000      | Subtilisin-like serine proteases                            | Protease                 | 49.1  | Yes | PF00082:Pfam:entry name:Peptidase_S8:match status:1:    | IPR000209:InterPro:entry name:Peptidase_S8/S53_dom:        | Unknown                                         | Spl |
| 0.138 | BF1733      | Beta-mannosidase                                            | Carbohydrate utilization | 99.0  |     | PF02837:Pfam:entry name:Glyco_hydro_2_N:match status:1: | IPR008979:InterPro:entry name:Galactose-bd-like:           | Unknown                                         | Spl |
| 0.138 | BF0085      | DPP-4 like, serine protease, T cell activation              | Protease                 | 80.7  | Yes | PF00930:Pfam:entry name:DPPV_N:match status:1:          | IPR002469:InterPro:entry name:Peptidase_S98_N:             | Unknown (may have multiple localization sites.) | Spl |
| 0.140 | BF9343_1548 | Putative ATP/GTP-binding protein                            | Other                    | 60.6  |     |                                                         |                                                            | Unknown                                         | x   |
| 0.140 | BF3305      | SusE like                                                   | SusD-like                | 58.2  | Yes | PF14292:Pfam:entry name:SusE:match status:1:            | IPR025970:InterPro:entry name:SusE:                        | Extracellular 9.65                              | Spl |
| 0.148 | BF9343_1938 | TsxD                                                        | Other                    | 15.4  |     | PF17642:Pfam:entry name:TsxD:match status:1:            |                                                            | Unknown                                         | x   |
| 0.148 | BF4937      | putative protease                                           | Extracellular, Other     | 120.2 |     | PF07676:Pfam:entry name:PDZ:match status:3:             | IPR001478:InterPro:entry name:PDZ:                         | Unknown                                         | Spl |
| 0.150 | BF4526      | Putative outer membrane protein probably involved           | SusD-like                | 66.7  | Yes | PF07980:Pfam:entry name:SusD:match status:1:            | IPR012944:InterPro:entry name:SusD_RagB_dom:               | Unknown                                         | Spl |
| 0.151 | BF0977      | Dipeptidyl peptidase IV, DPP-4 like, serine protease        | Protease                 | 84.1  | Yes | PF00930:Pfam:entry name:DPPV_N:match status:1:          | IPR001375:InterPro:entry name:Peptidase_S9:                | Unknown                                         | Spl |
| 0.155 | VU15_18680* | MplI                                                        | Virulence                | 44.4  | Yes | PF16376:Pfam:entry name:fragilysinNterm:match status:1: | IPR001843:InterPro:entry name:Fragilysin:                  | Extracellular 9.72                              | Spl |
| 0.156 | BF4459      | Glycoside hydrolase family 65, alpha fucosidase             | Carbohydrate utilization | 93.1  | Yes | PF14498:Pfam:entry name:Glyco_hyd_65N_2:match status:1: | IPR016518:InterPro:entry name:Alpha-L-fucosidase:          | Unknown                                         | Spl |
| 0.159 | BF0662      | Uncharacterized protein                                     | Unknown                  | 31.7  | Yes |                                                         |                                                            | Unknown (may have multiple localization sites.) | Spl |
| 0.159 | BF2126      | Fimbrillin C, major fimbrial subunit related to P. jimbriae | Fimbrae                  | 58.2  | Yes | PF15495:Pfam:entry name:Fimbrillin_C:match status:1:    | IPR029141:InterPro:entry name:FimA_N:                      | Unknown (may have multiple localization sites.) | Spl |
| 0.160 | BF9343_2554 | LysM, bacterial cell wall degradation, peptidoglycan        | Enzyme, Other            | 67.1  | Yes | PF01476:Pfam:entry name:LysM:match status:3:            | IPR018392:InterPro:entry name:LysM_dom:                    | Unknown                                         | Spl |
| 0.165 | BF4565      | DUF2059                                                     | Unknown                  | 17.0  | Yes | PF09832:Pfam:entry name:DUF2059:match status:1:         | IPR018637:InterPro:entry name:DUF2059:                     | Unknown                                         | Spl |
| 0.167 | BF1144      | Alpha-xyloridase                                            | Carbohydrate utilization | 144.3 | Yes | PF16338:Pfam:entry name:DUF4968:match status:1:         | IPR016134:InterPro:entry name:Cellulose_entz_dockerin_1:   | OuterMembrane 9.52                              | Spl |
| 0.173 | BF1566      | MACPF domain, bacteriocin like, pore forming                | MACPF domain             | 54.7  |     | PF01823:Pfam:entry name:MACPF:match status:1:           | IPR020864:InterPro:entry name:MACPF:                       | Unknown                                         | Spl |
| 0.175 | BF1327      | SusD-like SusD-like_2 SusD-like_3                           | SusD-like                | 57.3  | Yes |                                                         |                                                            | Unknown                                         | Spl |
| 0.176 | BF1185      | Uncharacterized protein                                     | Unknown                  | 20.0  | Yes |                                                         |                                                            | Unknown                                         | Spl |
| 0.177 | BF3907      | DUF4114                                                     | Unknown                  | 76.7  | Yes | PF13448:Pfam:entry name:DUF4114:match status:1:         | IPR031025:InterPro:entry name:LruC_dom:                    | Unknown                                         | Spl |
| 0.180 | BF2219      | Putative outer membrane protein involved in nuTDR           | Unknown                  | 121.2 | Yes | PF07715:Pfam:entry name:Plug:match status:1:            | IPR014766:InterPro:entry name:CarboxyPept_regulatory_do    | Unknown                                         | Spl |
| 0.181 | BF6388_3874 | Putative exported protein, BACON domain                     | BACON                    | 90.8  | Yes | PF13004:Pfam:entry name:BACON:match status:1:           | IPR024361:InterPro:entry name:BACON:                       | OuterMembrane 9.52                              | Spl |
| 0.186 | BF9343_2008 | DUF 1573                                                    | Unknown                  | 14.4  | Yes | PF07101:Pfam:entry name:DUF1573:match status:1:         | IPR011467:InterPro:entry name:DUF1573:                     | Unknown                                         | Spl |
| 0.189 | BFAG_01064* | SusD family protein, RagB like                              | SusD-like                | 76.1  |     | PF07980:Pfam:entry name:SusD:match status:1:            | IPR012944:InterPro:entry name:SusD_RagB_dom:               | Unknown                                         | Spl |
| 0.190 | BF2101      | Uncharacterized protein Bacteroidetes specific              | Bacteroidetes specific   | 24.4  | Yes | PF16246:Pfam:entry name:DUF4903:match status:1:         | IPR025970:InterPro:entry name:DUF4903:                     | Unknown (may have multiple localization sites.) | Spl |
| 0.190 | BF3306      | Putative outer membrane protein probably involved           | SusD-like                | 60.3  | Yes | PF07980:Pfam:entry name:SusD:match status:1:            | IPR012944:InterPro:entry name:SusD_RagB_dom:               | Unknown                                         | Spl |
| 0.192 | BF1680      | 3KOG like, putative pore forming toxin, putative            | Adhesion                 | 38.0  | Yes | PF12985:Pfam:entry name:DUF3869:match status:1:         | IPR024620:InterPro:entry name:DUF3869:                     | Unknown                                         | Spl |
| 0.193 | BF0927      | Uncharacterized protein Bacteroidetes specific              | Bacteroidetes specific   | 24.4  | Yes | PF11644:Pfam:entry name:DUF3256:match status:1:         | IPR021670:InterPro:entry name:DUF3256:                     | Unknown                                         | Spl |
| 0.196 | BF9343_3703 | Mfa2, Fimbrillin associated anchor proteins                 | Mfa2, Fimbrae            | 44.6  | Yes | PF08842:Pfam:entry name:Mfa2:match status:1:            | IPR014941:InterPro:entry name:FimA-assoc_Mfa1/Mfa2:        | Unknown                                         | Spl |
| 0.201 | BF4485      | TPR domain                                                  | TPR                      | 60.3  |     | PF13181:Pfam:entry name:TPR_8:match status:1:           | IPR011990:InterPro:entry name:TPR-like_helical_dom:        | Unknown                                         | x   |
| 0.203 | BF1563      | Mfa2, lipoprotein, Mfa1/2 major fimbrial subunit            | Fimbrae                  | 37.4  |     | PF08842:Pfam:entry name:Mfa2:match status:2:            | IPR014941:InterPro:entry name:FimA-assoc_Mfa1/Mfa2:        | Extracellular 9.64                              | Spl |

|                         |                                                       |                          |       |     |                                                          |                                                            |                                                 |       |     |
|-------------------------|-------------------------------------------------------|--------------------------|-------|-----|----------------------------------------------------------|------------------------------------------------------------|-------------------------------------------------|-------|-----|
| 0.206 BF0475            | DUF4699                                               | Unknown                  | 24.6  | Yes |                                                          |                                                            | Unknown                                         |       | Spl |
| 0.207 BF638R_3592       | putative exported lipoprotein                         | Lipoprotein              | 55.6  | Yes | PF16272: Pfam:entry name:DUF4925:match status:1:         | IPR032573: InterPro:entry name:DUF4925:                    | Unknown                                         |       | Spl |
| 0.210 BF4022            | Hyaluronoglucosaminidase                              | Carbohydrate utilization | 84.3  | Yes | PF02838: Pfam:entry name:Glyco_hydro_20b:match status:1: | IPR017853: InterPro:entry name:Glycoside_hydrolyase_SF:    | Unknown                                         |       | Spl |
| 0.211 BF1698            | Putative cell surface antigen LRR domain              | LRR domain               | 57.2  | Yes | PF13306: Pfam:entry name:LRR_5:match status:2:           | IPR032675: InterPro:entry name:l_dom_like:                 | Unknown                                         |       | Spl |
| 0.212 BF0887            | Glycanase, copper binding                             | Carbohydrate utilization | 46.5  | Yes | PF09112: Pfam:entry name:N-glycanase_N:match status:1:   | IPR014784: InterPro:entry name:Cu2_ascorb_mOase-like_C:    | Unknown                                         |       | Spl |
| 0.224 BF1404            | Secreted protein, putative porin, CFG group bac       | Extracellular            | 30.7  | Yes | PF15283: Pfam:entry name:DUF4595:match status:1:         | IPR027931: InterPro:entry name:DUF4595:                    | Unknown (may have multiple localization sites.) |       | Spl |
| 0.230 BF9343_1843       | Uncharacterized protein                               | Unknown                  | 47.9  | Yes |                                                          |                                                            | Unknown                                         |       | Spl |
| 0.235 BF9343_0726       | Putative lipoprotein                                  | Lipoprotein              | 40.9  | Yes |                                                          |                                                            | Unknown                                         |       | Spl |
| 0.235 BF3627            | Lipoprotein DUF4493                                   | Lipoprotein              | 78.7  | Yes | PF14900: Pfam:entry name:DUF4493:match status:1:         | IPR027840: InterPro:entry name:DUF4493:                    | Unknown                                         |       | Spl |
| 0.236 BF1662            | SPOR domain, cell division                            | Other                    | 17.8  | Yes | PF05036: Pfam:entry name:SPOR:match status:1:            | IPR007730: InterPro:entry name:SPOR_dom:                   | Unknown                                         |       | Spl |
| 0.238 VU15_18690*       | Fragilysin                                            | Virulence                | 44.4  | Yes | PF16376: Pfam:entry name:fragilysinNterm:match status:1: | IPR024079: InterPro:entry name:MetalloPept_cat_dom:        | Extracellular                                   | 10.00 | Spl |
| 0.252 BF0572            | Lipoprotein, PDZ domain                               | Lipoprotein              | 24.3  | Yes | PF13590: Pfam:entry name:DUF4136:match status:1:         | IPR025411: InterPro:entry name:DUF4136:                    | Unknown                                         |       | Spl |
| 0.256 BF3813            | Uncharacterized protein Bacteroides specific          | Bacteroidetes specific   | 18.9  | Yes | PF16438: Pfam:entry name:DUF5035:match status:1:         | IPR022216: InterPro:entry name:DUF5035:                    | Unknown (may have multiple localization sites.) |       | Spl |
| 0.257 BF0931            | Glycosyl hydrolase family 109 protein 1               | Carbohydrate utilization | 52.1  | Yes | PF01408: Pfam:entry name:GFO_IDH_MockA:match status:1:   | IPR016040: InterPro:entry name:NAD(P)-bd_dom:              | Unknown (may have multiple localization sites.) |       | Spl |
| 0.264 BF9343_1449       | Uncharacterized protein                               | Unknown                  | 9.2   | Yes |                                                          |                                                            | Unknown                                         |       | x   |
| 0.269 BF3626            | Lipoprotein DUF4493                                   | Lipoprotein              | 24.3  | Yes | PF14900: Pfam:entry name:DUF4493:match status:1:         | IPR027840: InterPro:entry name:DUF4493:                    | Unknown                                         |       | Spl |
| 0.275 BF1217            | Putative secreted protein, META domain                | Extracellular            | 28.1  | Yes | PF03724: Pfam:entry name:META:match status:2:            | IPR005184: InterPro:entry name:DUF306_Meta_HsII:           | Unknown                                         |       | Spl |
| 0.281 BF2929            | TBDR                                                  | TBDR                     | 45.8  | Yes |                                                          | IPR008969: InterPro:entry name:CarboxyPept-like_regulatory | Unknown                                         |       | Spl |
| 0.293 BF1460            | Putative outer membrane protein                       | Membrane, Other          | 54.6  | Yes |                                                          |                                                            | OuterMembrane                                   | 9.49  | Spl |
| 0.294 BF1682            | Major outer membrane protein OmpA                     | OMP                      | 40.0  | Yes | PF00691: Pfam:entry name:OmpA:match status:1:            | IPR006665: InterPro:entry name:OmpA/MotB_C:                | OuterMembrane                                   | 9.93  | Spl |
| 0.295 BF4019            | B-galactosidase                                       | Carbohydrate utilization | 71.1  | Yes | PF01301: Pfam:entry name:Glyco_hydro_35:match status:1:  | IPR026283: InterPro:entry name:B-gal_1-like:               | Unknown                                         |       | Spl |
| 0.301 BF3631            | Lipoprotein DUF4493                                   | Lipoprotein              | 47.7  | Yes | PF14900: Pfam:entry name:DUF4493:match status:1:         | IPR027840: InterPro:entry name:DUF4493:                    | Unknown                                         |       | Spl |
| 0.302 BF0875            | Alpha/beta hydrolase                                  | Enzyme, Other            | 49.7  | Yes | PF12695: Pfam:entry name:Abhydrolase_5:match status:1:   | IPR024981: InterPro:entry name:DUF3887:                    | Unknown (may have multiple localization sites.) |       | Spl |
| 0.303 BF2739            | Putative beta lactamase inhibitor, PepSY like         | Inhibitor, Other         | 31.9  | Yes | PF11396: Pfam:entry name:PepSY_like:match status:2:      | IPR021533: InterPro:entry name:PepSY_like:                 | Unknown (may have multiple localization sites.) |       | Spl |
| 0.303 BF2659            | Putative outer membrane protein DUF 4842, Ig- Adhesin |                          | 89.5  | Yes | PF16130: Pfam:entry name:DUF4842:match status:1:         | IPR032295: InterPro:entry name:DUF4842:                    | Unknown                                         |       | Spl |
| 0.305 BF1991            | Putative TonB-dependent outer membrane prot           | TBDR                     | 102.0 | Yes | PF07715: Pfam:entry name:Plug:match status:1:            | IPR012910: InterPro:entry name:Plug_dom:                   | OuterMembrane                                   | 9.52  | Spl |
| 0.309 BF3275            | Beta-glucanase                                        | Carbohydrate utilization | 31.1  | Yes | PF00722: Pfam:entry name:Glyco_hydro_16:match status:1:  | IPR013320: InterPro:entry name:ConA-like_dom:              | Unknown                                         |       | Spl |
| 0.313 BF1897            | OmpA family outer membrane protein                    | OMP                      | 23.1  | Yes | PF00691: Pfam:entry name:OmpA:match status:1:            | IPR006664: InterPro:entry name:OMP_bac:                    | OuterMembrane                                   | 9.45  | Spl |
| 0.314 BF4555            | Uncharacterized protein                               | Unknown                  | 44.4  | Yes | PF14298: Pfam:entry name:DUF4374:match status:1:         | IPR025401: InterPro:entry name:DUF4374:                    | Unknown                                         |       | Spl |
| 0.326 BF9343_3342       | Putative exported protein Lipoprotein DUF4493         | Lipoprotein              | 65.5  | Yes | PF14900: Pfam:entry name:DUF4493:match status:1:         | IPR025112: InterPro:entry name:DUF4493:                    | OuterMembrane                                   | 9.52  | Spl |
| 0.327 BF3667            | Flavodoxin                                            | Redox, Other             | 18.5  | Yes | PF02568: Pfam:entry name:Flavodoxin_1:match status:1:    | IPR010086: InterPro:entry name:Flavodoxin_1c:              | Unknown                                         |       | x   |
| 0.349 BF638R_3589       | PCDM domain, carbohydrate metabolism                  | Carbohydrate utilization | 40.2  | Yes | PF13201: Pfam:entry name:PCMD:match status:1:            | IPR025112: InterPro:entry name:PCMD:                       | Unknown                                         |       | Spl |
| 0.361 BF1198            | Collagen like, extracellular                          | Extracellular            | 85.3  | Yes | PF01391: Pfam:entry name:Collagen:match status:1:        | IPR008160: InterPro:entry name:Collagen:                   | Unknown                                         |       | x   |
| 0.363 BF3101            | Discoidin domain, BACON domain                        | BACON                    | 103.6 | Yes | PF00754: Pfam:entry name:F5_F8_type_C:match status:1:    | IPR024361: InterPro:entry name:BACON:                      | Unknown                                         |       | Spl |
| 0.371 BF3632            | Putative exported protein Lipoprotein DUF4493         | Lipoprotein              | 29.1  | Yes | PF14900: Pfam:entry name:DUF4493:match status:1:         | IPR027840: InterPro:entry name:DUF4493:                    | Unknown                                         |       | Spl |
| 0.375 BF4037            | Major outer membrane protein OmpA                     | OMP                      | 43.3  | Yes | PF00691: Pfam:entry name:OmpA:match status:1:            | IPR006665: InterPro:entry name:OmpA/MotB_C:                | OuterMembrane                                   | 9.93  | Spl |
| 0.393 BF3370            | Putative outer membrane protein probably invol        | SusD-like                | 64.6  | Yes | PF07980: Pfam:entry name:SusD:match status:1:            | IPR011990: InterPro:entry name:TPR-like_helical_dom:       | Unknown (may have multiple localization sites.) |       | Spl |
| 0.406 BF1298            | Putative outer membrane protein OmpA                  | OMP                      | 42.4  | Yes | PF00691: Pfam:entry name:OmpA:match status:1:            | IPR011250: InterPro:entry name:OMP/PagP_b-ri:              | OuterMembrane                                   | 9.93  | Spl |
| 0.408 BF9343_0883       | Uncharacterized protein DUF 4272                      | Unknown                  | 56.2  | Yes | PF14092: Pfam:entry name:DUF4270:match status:1:         | IPR025366: InterPro:entry name:DUF4270:                    | Unknown                                         |       | Spl |
| 0.481 BF2138            | Putative outer membrane protein probably invol        | TBDR                     | 123.5 | Yes | PF07715: Pfam:entry name:Plug:match status:1:            | IPR008969: InterPro:entry name:CarboxyPept-like_regulatory | OuterMembrane                                   | 9.52  | Spl |
| 0.486 BF2203            | Uncharacterized protein                               | Unknown                  | 26.6  | Yes |                                                          |                                                            | Unknown                                         |       | Spl |
| 0.495 BF2536            | OMP beta barrel domain                                | OMP                      | 18.9  | Yes | PF13505: Pfam:entry name:OMP_b-ri:match status:1:        | IPR027385: InterPro:entry name:OMP_b-ri:                   | Unknown                                         |       | Spl |
| 0.516 BF2675            | TonB-dependent outer membrane receptor                | TPR                      | 85.6  | Yes | PF00593: Pfam:entry name:TonB_dep_Rec:match status:1:    | IPR008969: InterPro:entry name:CarboxyPept-like_regulatory | OuterMembrane                                   | 9.93  | Spl |
| 0.520 BF3307            | Outer membrane protein probably involved in n         | TBDR                     | 111.0 | Yes | PF07715: Pfam:entry name:Plug:match status:1:            | IPR012910: InterPro:entry name:Plug_dom:                   | OuterMembrane                                   | 9.52  | Spl |
| 0.539 BF3102            | Putative chitinase                                    | Carbohydrate utilization | 33.0  | Yes | PF00754: Pfam:entry name:F5_F8_type_C:match status:1:    | IPR032527: InterPro:entry name:DUF4959:                    | Unknown                                         |       | Spl |
| 0.549 BF9343_1433       | Putative cholesteryltransferase                       | Enzyme, Other            | 37.2  | Yes | PF02275: Pfam:entry name:CBAH:match status:1:            | IPR029055: InterPro:entry name:Ntn_hydrolases_N:           | Unknown                                         |       | x   |
| 0.549 BF3103            | SusD like, RagB like                                  | SusD-like                | 71.7  | Yes | PF07980: Pfam:entry name:SusD:match status:1:            | IPR012944: InterPro:entry name:SusD_RagB_dom:              | Unknown                                         |       | Spl |
| 0.570 BF3628            | PCDM domain, carbohydrate metabolism                  | Carbohydrate utilization | 59.4  | Yes | PF13201: Pfam:entry name:PCMD:match status:1:            | IPR013783: InterPro:entry name:lg-like_fold:               | OuterMembrane                                   | 9.49  | Spl |
| 0.590 BF9343_0567       | Putative membrane protein, TBDR plug domain           | TBDR                     | 111.7 | Yes | PF07715: Pfam:entry name:Plug:match status:1:            | IPR012910: InterPro:entry name:Plug_dom:                   | Unknown (may have multiple localization sites.) |       | Spl |
| 0.607 BF3397            | Mfa2, Fimbriin associated anchor proteins Mf          | Fimbrae                  | 43.7  | Yes | PF08842: Pfam:entry name:Mfa2:match status:1:            | IPR014941: InterPro:entry name:FimA-assoc_Mfa1/Mfa2:       | Unknown                                         |       | Spl |
| 0.625 BF1894            | Outer membrane protein OmpI21                         | OMP                      | 124.7 | Yes | PF07715: Pfam:entry name:Plug:match status:1:            | IPR012910: InterPro:entry name:Plug_dom:                   | Unknown                                         |       | Spl |
| 0.634 BF2687            | HmuV, heme binding, extracellular                     | Hmu family               | 25.0  | Yes | PF14064: Pfam:entry name:HmuV:match status:1:            | IPR025921: InterPro:entry name:HmuV:                       | Extracellular                                   | 9.64  | Spl |
| 0.653 BF0571            | OMP beta barrel domain                                | OMP                      | 23.3  | Yes | PF13505: Pfam:entry name:OMP_b-ri:match status:1:        | IPR027385: InterPro:entry name:OMP_b-ri:                   | Unknown                                         |       | Spl |
| 0.735 BF0671            | SusD like, RagB like                                  | SusD-like                | 51.9  | Yes | PF07980: Pfam:entry name:SusD:match status:1:            | IPR012944: InterPro:entry name:SusD_RagB_dom:              | Unknown                                         |       | Spl |
| 0.757 BF2844            | TsxD Sfil_C                                           | Unknown                  | 14.7  | Yes |                                                          |                                                            | Unknown                                         |       | x   |
| 0.779 BF4460            | Putative outer membrane protein probably invol        | TBDR                     | 120.8 | Yes | PF07715: Pfam:entry name:Plug:match status:1:            | IPR023996: InterPro:entry name:TonB-dep_OMP_SusC/RagA      | OuterMembrane                                   | 9.52  | Spl |
| 0.827 BF1193            | Uncharacterized protein                               | Unknown                  | 57.7  | Yes |                                                          |                                                            | OuterMembrane                                   | 9.52  | Spl |
| 1.050 BF9343_3355       | SusD like, TPR domain                                 | SusD-like                | 55.7  | Yes | PF07980: Pfam:entry name:SusD:match status:1:            | IPR011990: InterPro:entry name:TPR-like_helical_dom:       | Unknown                                         |       | Spl |
| 1.663 BF1116            | HmuV, heme binding, extracellular                     | Hmu family               | 23.1  | Yes | PF14064: Pfam:entry name:HmuV:match status:1:            | IPR025921: InterPro:entry name:HmuV:                       | Unknown (may have multiple localization sites.) |       | Spl |
| 1.669 BF9343_3356       | Putative lipoprotein DUF 4929 Bacteroides spec        | Lipoprotein              | 45.2  | Yes | PF16283: Pfam:entry name:DUF4929:match status:1:         | IPR032562: InterPro:entry name:DUF4929:                    | Unknown                                         |       | Spl |
| 1.961 BF2099            | LRR domain, common cell surface domain                | LRR domain               | 52.9  | Yes |                                                          | IPR032675: InterPro:entry name:l_dom_like:                 | Unknown                                         |       | Spl |
| 3.527 BF0019            | HmuR, Ferrichrome-iron receptor                       | Hmu family               | 89.6  | Yes | PF00593: Pfam:entry name:TonB_dep_Rec:match status:1:    | IPR014766: InterPro:entry name:CarboxyPept_regulatory_dor  | OuterMembrane                                   | 10.00 | Spl |
| 4.069 HMPREF1080_02980* | Lipocalin-like                                        | Lipocalin                | 13.9  | Yes | PF13944: Pfam:entry name:Calycin_like:match status:1:    | IPR024311: InterPro:entry name:Lipocalin-like:             | Unknown                                         |       | Spl |
| 6.382 BF2334            | Uncharacterized protein                               | Unknown                  | 82.4  | Yes | PF08614: Pfam:entry name:ATG16                           |                                                            | Unknown                                         |       | x   |
| 9.702 BF4004            | Putative Antimicrobial protein, inhibitor, gamm       | Extracellular, Other     | 31.8  | Yes |                                                          | IPR011024: InterPro:entry name:G_crystallin-rel:           | Unknown                                         |       | Spl |

\* Gene IDs are from Genbank

Table S3. Primers used for qRT-PCR

| <b>Primer</b>        | <b>Sequence</b>                                                       |
|----------------------|-----------------------------------------------------------------------|
| BFT                  | see reference 5                                                       |
| FimC                 | F 5'-TGATTCATCTGCAGCTGCTAT-3'<br>R 5'-TTCTCTGCGCCTGTCGGAAGAGTT-3'     |
| DUF5017              | F 5'-GCCGAAAAGCGAGATGGGAGTT-3'<br>R 5'-TGCGGCAGCCTCTACATTACC C-3'     |
| Putative lipoprotein | F 5'-GGATATTCAACTGTGGCCCCATTT-3'<br>R 5'-TCAGCAATAGCAGCAGGTTTCATCC-3' |
| Putative Adhesin     | F 5'-CCGGACAGTTGGATGGCTCAG-3'<br>R 5'-GCCGTTACATTTTCAGCATCCAGT-3'     |
| GapDH                | F 5'-CACTTCATACGCAGGACAGGACATCA-3'<br>R 5'-ACGCGGAATGCCATACCAGTCA-3'  |
